# Supplementary material for: Genetic variation of putative myokine signaling is dominated by biological sex and sex hormones
Source: eLife journal article supplement (doi:10.7554/elife.76887), 2022-04-12

**Figure 1: Figure supplement 1 - Skeletal muscle sex hormone receptor expression between sexes:** Normalized gene expression levels for androgen receptor (*AR*) or estrogen receptor (*ESR1*) (y-axis) in each sex (x-axis). None of the expression levels were significantly different between sexes (students t-test,

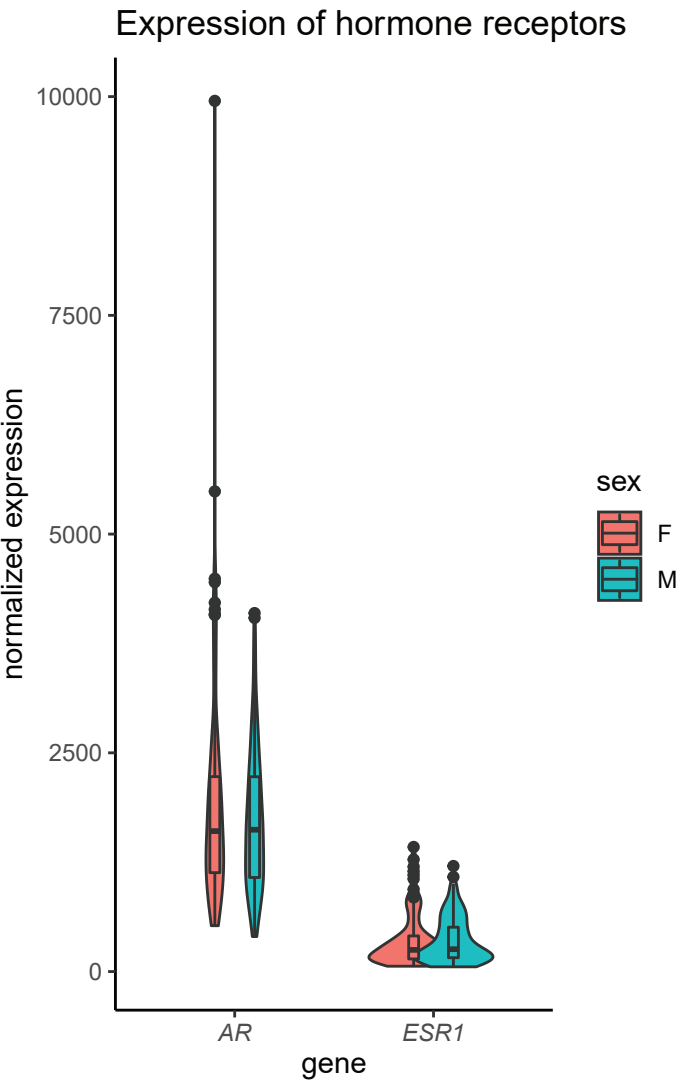

Supplement: supp [file elife_poa_e76887_Figure_1_figure_supplement_1.pdf › elife_poa_e76887_Figure_1_figure_supplement_1.pdf]
