# Supplementary material for: Genetic variation of putative myokine signaling is dominated by biological sex and sex hormones
Source: eLife journal article supplement (doi:10.7554/elife.76887), 2022-04-12

**Figure 1: Figure Supplement 2 - Immunoblot for myostatin in EDL muscle from WT and MERKO male and female mice.** Full Immunoblots shown for skeletal muscle lysate blotted for myostatin (top) or  $\beta$ -ac-tin (bottom) corresponding to different C57BL/6J male (left) or female (right) mice in either WT (floxed) or KO (floxed-cre) for skeletal muscle *Esr1*. Band sizes shown to indicate either precursor (top band) or processed/LAP form (bottom band) of myostatin.

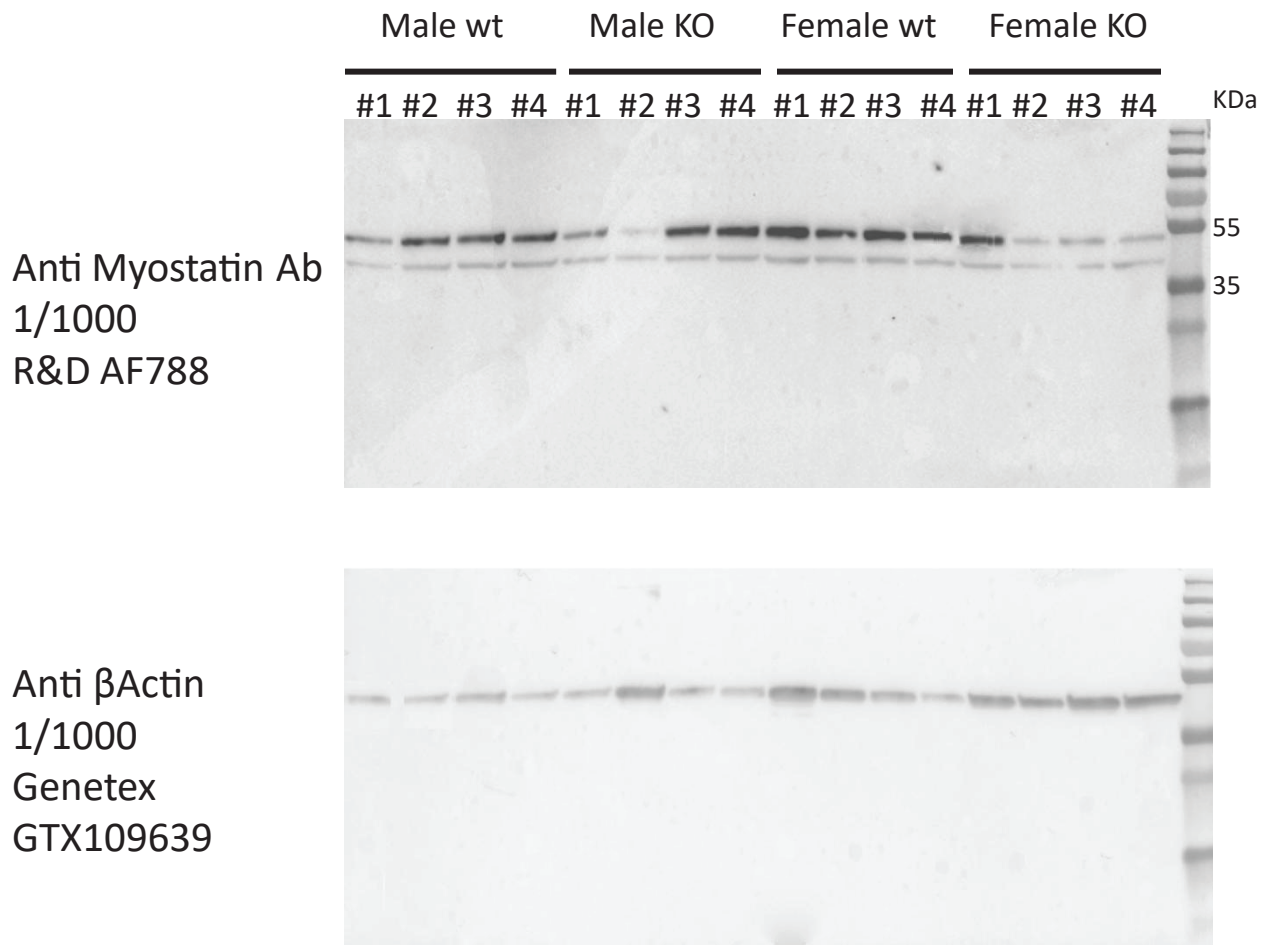

Supplement: supp [file elife_poa_e76887_Figure_1_figure_supplement_2.pdf › elife_poa_e76887_Figure_1_figure_supplement_2.pdf]
