# Supplementary material for: Genetic variation of putative myokine signaling is dominated by biological sex and sex hormones
Source: eLife journal article supplement (doi:10.7554/elife.76887), 2022-04-12

**Figure 3: Figure supplement 1- Comparisons of deconvolution methods** Cell proportions were estimated from skeletal muscle sequencing across the 310 individuals in GTEx. Here, comparisons of the three most common methods (DCQ, NNLS and proportionsInAdmixture) were plotted for each pseudo-sc-proportion, where proportionsInAdmixture method captured the largest relative number of cell types

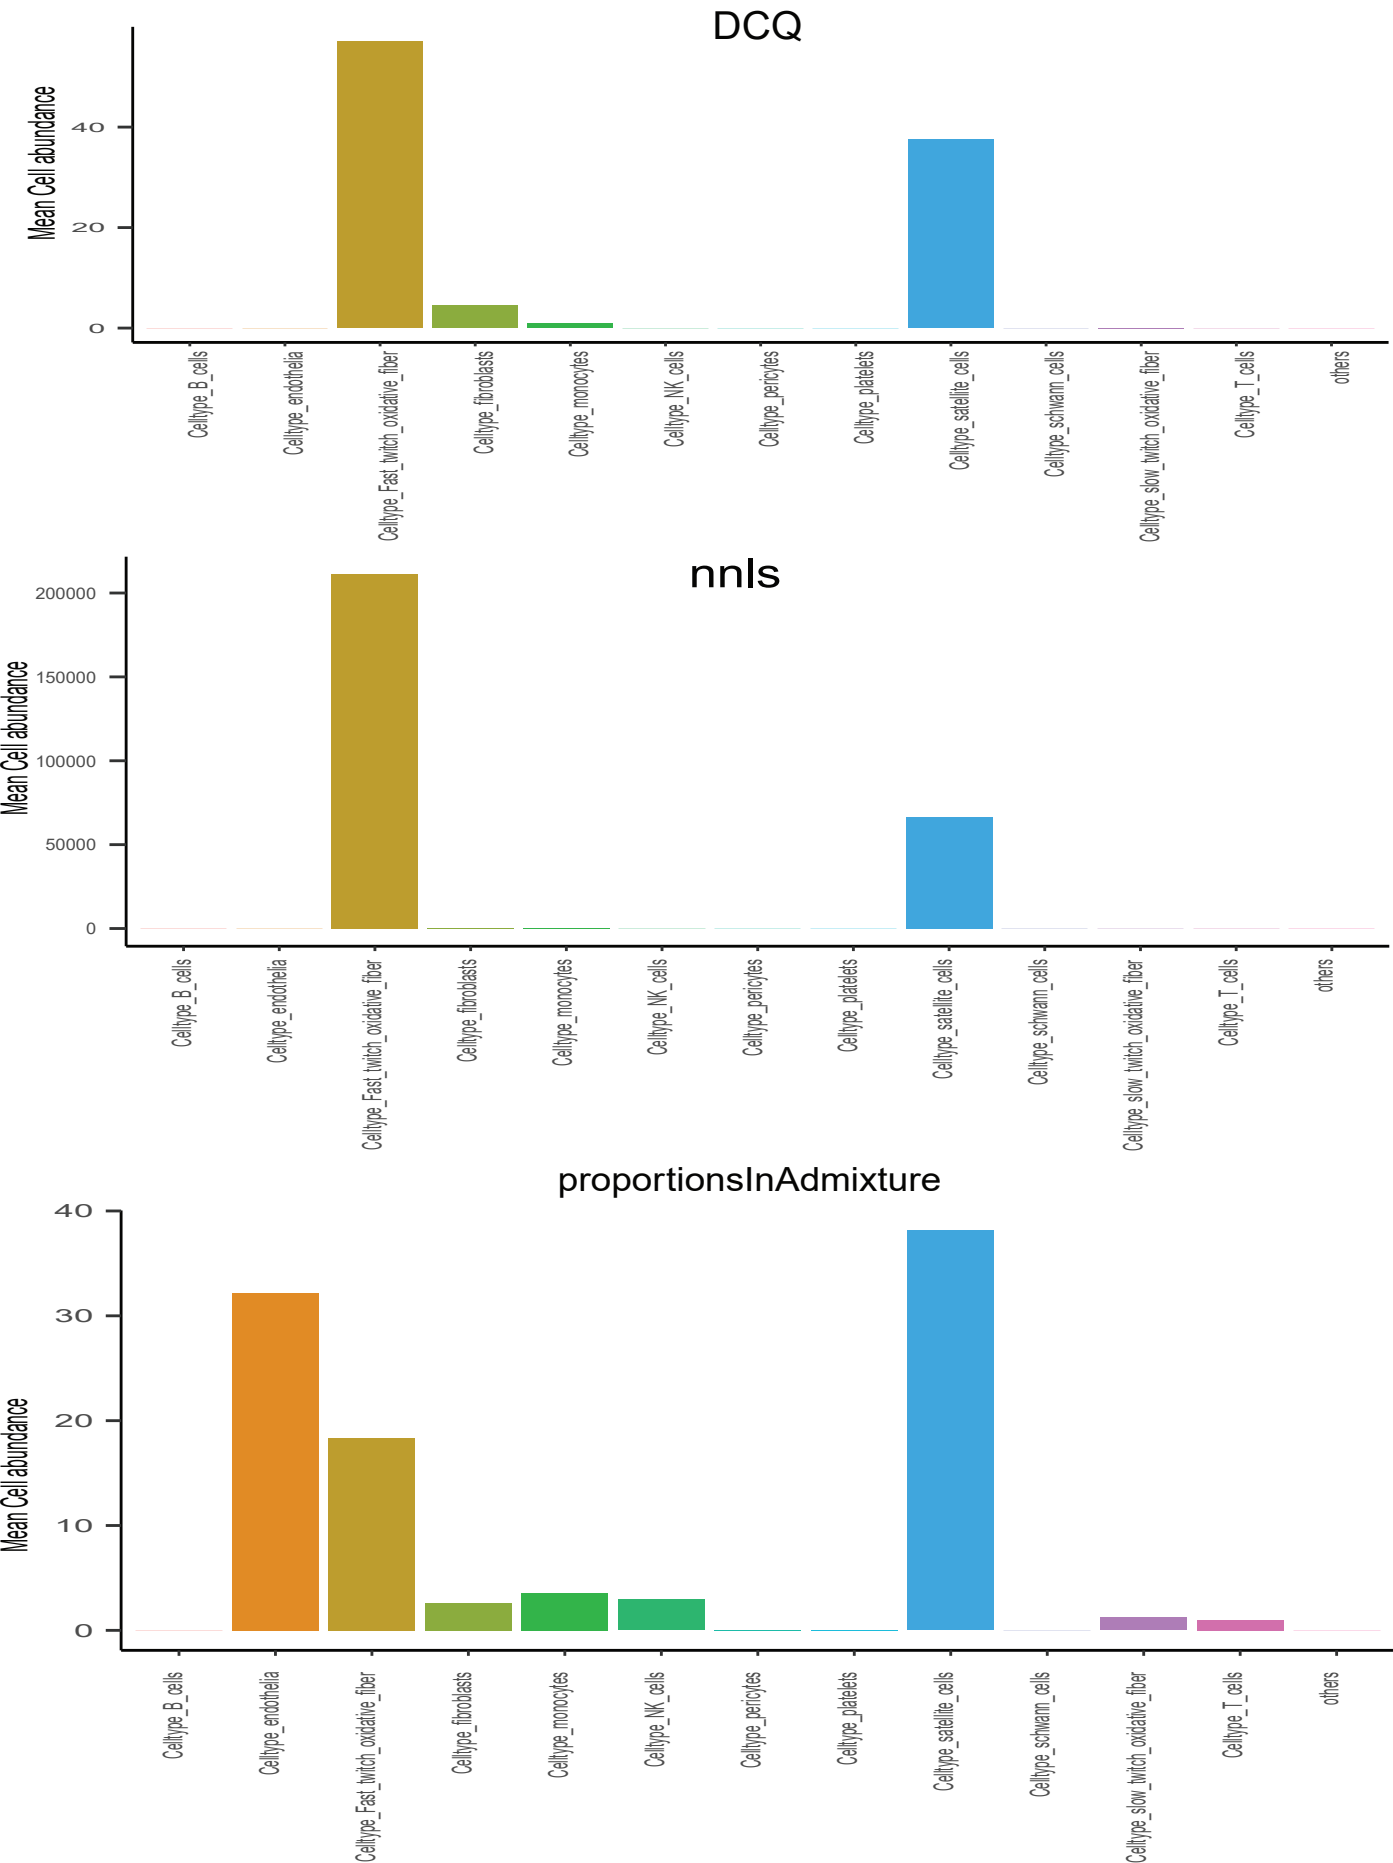

Supplement: supp [file elife_poa_e76887_Figure_3_figure_supplement_1.pdf › elife_poa_e76887_Figure_3_figure_supplement_1.pdf]
