# Supplementary material for: Genetic variation of putative myokine signaling is dominated by biological sex and sex hormones
Source: eLife journal article supplement (doi:10.7554/elife.76887), 2022-04-12

**Figure 3: Figure supplement 2 - Cell composition correlations within each sex:** Heatmaps showing regressions for cell proportions in males (left) or females (right), \* = regression pvalue<0.01

Correlations between muscle cell proportions

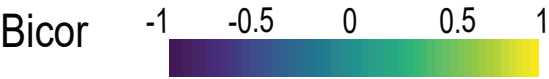

Males

Females

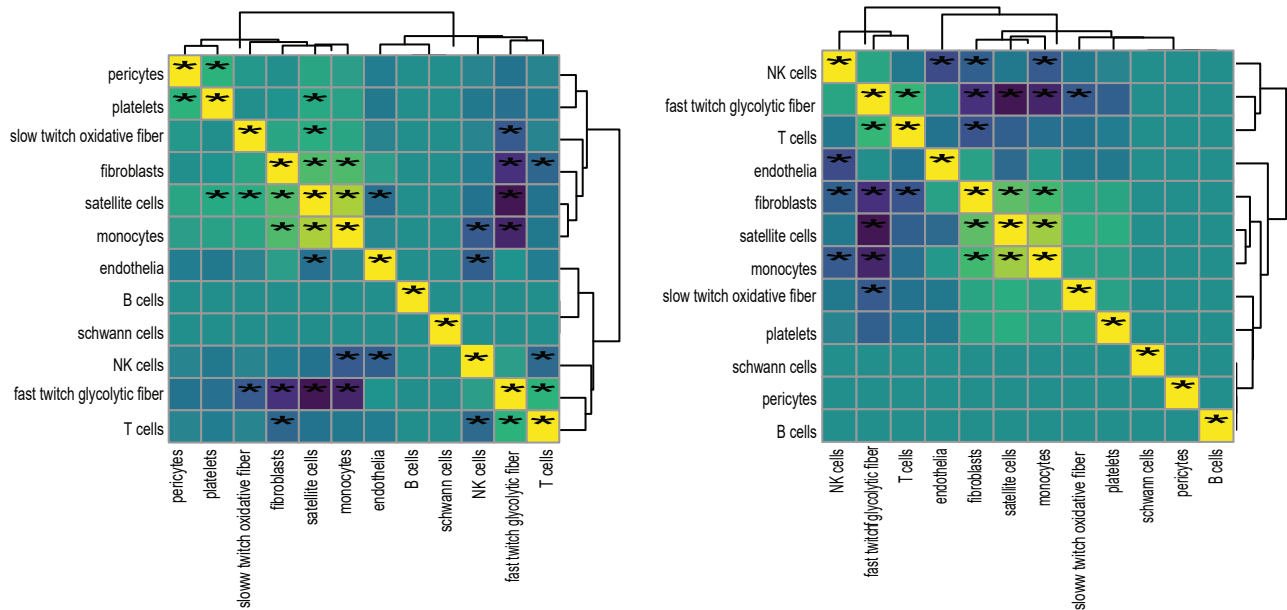

Supplement: supp [file elife_poa_e76887_Figure_3_figure_supplement_2.pdf › elife_poa_e76887_Figure_3_figure_supplement_2.pdf]
