# Supplementary material for: Genetic variation of putative myokine signaling is dominated by biological sex and sex hormones
Source: eLife. 2022 Apr 13;11:e76887. doi: 10.7554/eLife.76887 (PMC9094747; doi:10.7554/eLife.76887)
Supplement: Supplementary file 1. [file elife-76887-supp1.xlsx]

## Sheet: Suppl Table 1 - DE of all myoki
Supplemental Table 1: DE statistics for myokines based on sex
Skeletal muscle gene symbol	baseMean	log2FoldChange	lfcSE	stat	pvalue	padj
IBSP	8.65069	2.82687	0.321793	8.78476	1.56703e-18	2.80655e-15
SPESP1	51.4445	0.930598	0.108789	8.55413	1.18764e-17	1.06353e-14
RNF43	20.0933	1.24876	0.155619	8.0245	1.01941e-15	6.08588e-13
ADCYAP1	16.5643	1.67265	0.244208	6.84929	7.42174e-12	3.32309e-09
NCAM1	1884.55	0.86152	0.133916	6.43329	1.2487e-10	4.47286e-08
SAA2	1297.69	1.82128	0.289322	6.29498	3.07443e-10	9.17717e-08
LTBP1	1337.32	-0.475015	0.0758679	-6.26107	3.82337e-10	9.78237e-08
IGFBP3	2935.01	-0.835211	0.137042	-6.09454	1.0975e-09	2.45702e-07
ATP13A4	34.2011	1.16473	0.194319	5.99393	2.04833e-09	4.07617e-07
MMP3	1559.8	1.8908	0.321445	5.88219	4.04881e-09	7.25141e-07
LIF	32.1766	0.955896	0.165283	5.7834	7.3206e-09	1.19193e-06
EMID1	39.9409	0.635506	0.116558	5.45229	4.97252e-08	7.42148e-06
CFH	1500.34	-0.51721	0.0955469	-5.41316	6.19236e-08	8.52819e-06
DIPK2B	1167.34	-0.267458	0.0495298	-5.39994	6.66637e-08	8.52819e-06
CHRDL2	185.444	0.919461	0.17235	5.33486	9.56201e-08	1.1417e-05
NUCB1	7260.32	0.23004	0.043544	5.28293	1.27131e-07	1.42308e-05
SAA4	60.705	1.51182	0.287381	5.26066	1.43538e-07	1.51222e-05
INHBB	878.483	-0.850129	0.162856	-5.22013	1.78796e-07	1.77902e-05
DHRSX	285.056	0.398952	0.0768134	5.19378	2.06068e-07	1.94246e-05
SERPINE1	1325.92	0.742457	0.144477	5.13892	2.7632e-07	2.47444e-05
TGFBR3	2068.79	-0.473864	0.0934312	-5.0718	3.94073e-07	3.36088e-05
PDGFD	147.898	-0.58917	0.120249	-4.89957	9.60482e-07	7.8192e-05
PLAU	492.307	0.602292	0.124511	4.83727	1.31633e-06	9.82309e-05
XYLT1	251.741	-0.465866	0.0962401	-4.84066	1.29406e-06	9.82309e-05
NMI	146.193	0.300866	0.0632723	4.7551	1.98348e-06	0.000142097
SMIM20	1588.96	0.26011	0.0549314	4.73518	2.18866e-06	0.000150765
COL16A1	946.256	-0.419932	0.0895675	-4.68843	2.75303e-06	0.000182617
PLIN2	22938	-0.698575	0.150416	-4.64429	3.41245e-06	0.000218275
HHIP	65.0351	-0.863549	0.188562	-4.57965	4.6575e-06	0.000287641
LCN15	33.7436	0.909843	0.19911	4.56955	4.88776e-06	0.000291799
NPPC	10.9411	1.12128	0.245795	4.56185	5.07056e-06	0.000292948
ADAMTS16	13.2007	1.07546	0.236829	4.54111	5.59591e-06	0.000313196
CACFD1	590.994	0.239984	0.0541814	4.42926	9.4558e-06	0.000513192
METRNL	412.441	-0.3965	0.089695	-4.42054	9.84564e-06	0.000518634
TGFB3	2541.08	-0.540495	0.122753	-4.4031	1.06715e-05	0.000546078
LAMA3	359.43	-0.307817	0.0701171	-4.39005	1.13325e-05	0.000563794
CCL8	8.88104	1.03593	0.239147	4.33179	1.47903e-05	0.000715931
TGFBI	1708.52	0.333633	0.0772218	4.32046	1.55705e-05	0.00073386
CHGB	475.785	-1.05261	0.244256	-4.30947	1.63645e-05	0.000751508
VOPP1	1144.04	0.256574	0.0598622	4.28608	1.81851e-05	0.000814237
FRZB	1480.29	-0.76037	0.17931	-4.24052	2.23e-05	0.000968034
ITIH4	5725.41	0.634051	0.149663	4.23652	2.2701e-05	0.000968034
SAA1	3655.83	1.17365	0.278246	4.21805	2.46425e-05	0.00102639
NAMPT	7567.26	0.636147	0.151008	4.21268	2.5236e-05	0.00102722
NRG2	610.58	-0.708201	0.168404	-4.20537	2.60657e-05	0.00103742
APOL6	655.111	0.517677	0.124287	4.16519	3.1109e-05	0.00116576
CXCL3	33.1168	0.792706	0.190012	4.17187	3.02109e-05	0.00116576
LCN8	74.4456	0.827385	0.198689	4.16421	3.12431e-05	0.00116576
RNASE7	10.1188	-0.649574	0.156304	-4.15585	3.24085e-05	0.00118456
OMD	74.417	-0.575633	0.138728	-4.14936	3.334e-05	0.00119424
DMBT1	24.4164	1.22092	0.297182	4.10832	3.9854e-05	0.00139958
OLFML2A	1623.46	-0.563225	0.137272	-4.10298	4.07862e-05	0.00140477
CTHRC1	88.1072	0.538698	0.13269	4.05982	4.91109e-05	0.00165958
QPCT	156.331	-0.571116	0.14143	-4.03816	5.38728e-05	0.00178678
SHISA4	10180.4	0.52447	0.130314	4.02466	5.70575e-05	0.001858
PKHD1	14.2043	0.74507	0.185916	4.00757	6.13463e-05	0.00196198
COL24A1	70.2719	-0.656808	0.164514	-3.9924	6.54067e-05	0.00204956
WNT10A	11.2331	0.829823	0.208032	3.98893	6.63733e-05	0.00204956
ADAMTS15	245.255	-0.336993	0.0848277	-3.97267	7.10703e-05	0.00215741
SHISA2	312.388	0.732902	0.187599	3.90675	9.35471e-05	0.00279238
RBP4	118.673	-0.786223	0.202084	-3.89057	0.000100008	0.00293629
ACSF2	2443.74	-0.412443	0.10665	-3.86724	0.000110072	0.00317966
LRRC8A	1470.91	-0.257365	0.0668008	-3.85272	0.000116811	0.00332078
ISM1	95.6588	-0.381005	0.0990324	-3.84728	0.000119439	0.00334242
LAMC2	220.681	-0.408985	0.106703	-3.83292	0.00012663	0.00348914
PCDHB13	53.1033	0.307837	0.0812844	3.78716	0.000152376	0.00413493
ADIPOQ	139.205	-0.791215	0.210393	-3.76065	0.000169476	0.00453031
HSPG2	9939.67	-0.271818	0.0723548	-3.75674	0.000172144	0.00453396
ANG	54.8058	-0.308937	0.0825357	-3.74307	0.000181788	0.00470226
CPED1	2273.85	0.399773	0.106916	3.73913	0.00018466	0.00470226
SLAMF1	18.0135	0.827636	0.221485	3.73676	0.00018641	0.00470226
GNE	936.033	-0.188723	0.0506721	-3.7244	0.000195784	0.00480341
IGHG4	9.70827	1.03094	0.276741	3.72528	0.000195095	0.00480341
CXCL10	36.013	1.05257	0.283069	3.71842	0.000200473	0.00485199
SARAF	5971.35	0.156964	0.0423776	3.70393	0.000212282	0.00506929
LEP	49.1508	-0.823547	0.224198	-3.67331	0.000239431	0.00557434
PRSS23	1459.41	0.540352	0.147112	3.67307	0.000239656	0.00557434
LOXL4	647.379	-0.471496	0.128528	-3.66842	0.000244051	0.00560378
APOL4	112.776	-0.494229	0.135656	-3.64326	0.000269206	0.00610313
FGF18	35.977	0.564374	0.155403	3.63169	0.000281572	0.00614995
TFPI	1532.95	-0.373891	0.102806	-3.63684	0.000276	0.00614995
TNFSF12	698.129	0.159253	0.0438457	3.63211	0.000281109	0.00614995
FIBIN	801.793	-0.482438	0.132969	-3.62821	0.000285397	0.00615839
DKK1	11.9145	-0.570171	0.157452	-3.62124	0.000293199	0.00625142
PLA2G5	18.0655	-0.485084	0.134246	-3.61339	0.00030222	0.00636796
MMP27	8.5199	0.640402	0.177565	3.60658	0.00031026	0.00646134
EDN3	25.8579	0.509691	0.141946	3.59075	0.000329723	0.00672632
ITGA10	1589.14	-0.778947	0.216968	-3.59014	0.000330495	0.00672632
LAMB1	3565.62	-0.367408	0.102463	-3.58576	0.000336101	0.00676356
VSIG4	294.364	-0.546207	0.153326	-3.56238	0.000367513	0.00731351
B3GNT9	112.988	-0.320859	0.0907243	-3.53664	0.000405248	0.00780429
RNASE4	483.183	-0.261539	0.0738684	-3.54061	0.000399209	0.00780429
SPINK2	21.004	0.810514	0.229007	3.53924	0.000401274	0.00780429
PTEN	2963.4	-0.235828	0.0668208	-3.52925	0.000416734	0.00794011
GBP1	456.38	0.401418	0.114032	3.52022	0.000431181	0.00812889
TRHDE	46.9381	-0.416574	0.118566	-3.51344	0.000442339	0.00825238
HSD17B14	27.5036	-0.331344	0.0945127	-3.50581	0.000455212	0.008405
ADIPOR1	5075.92	0.145356	0.0418813	3.47067	0.000519152	0.00948777
PODNL1	44.2115	0.426153	0.123038	3.4636	0.000532997	0.00964241
GLT1D1	546.506	0.482111	0.139619	3.45304	0.000554302	0.00992754
CYB5D2	517.25	0.195997	0.0570437	3.43591	0.000590575	0.0102994
HGFAC	29.6974	-0.573422	0.166992	-3.43384	0.0005951	0.0102994
SPP1	54.6776	0.701486	0.20404	3.43798	0.000586074	0.0102994
TMEM25	440.116	0.193638	0.0564133	3.43249	0.000598068	0.0102994
UNC5B	291.169	0.422433	0.123257	3.42727	0.000609684	0.0103995
FN1	5610.05	0.419179	0.122676	3.41695	0.000633271	0.0106999
ANKH	5564.96	0.279309	0.0819337	3.40897	0.000652092	0.0108265
CCL2	222.922	0.582069	0.170763	3.40864	0.000652876	0.0108265
TMEM143	3619.48	0.287545	0.0844196	3.40613	0.000658896	0.0108265
GPI	21049.2	0.227041	0.067531	3.36203	0.000773718	0.0125049
PLXNA2	3103.18	-0.293777	0.0873927	-3.36157	0.00077501	0.0125049
MMP17	70.0706	0.353903	0.105556	3.35274	0.000800161	0.0127954
MMP14	1582.06	-0.281636	0.0842901	-3.34126	0.000833983	0.0131023
TMEM119	82.3994	0.621649	0.185949	3.34312	0.000828434	0.0131023
FBN3	24.5124	0.712677	0.213588	3.33668	0.000847843	0.0132042
GREM2	798.895	0.78912	0.237315	3.3252	0.000883553	0.0136418
CCBE1	42.2312	-0.541561	0.162987	-3.32273	0.000891403	0.0136453
IL25	8.35153	-0.686325	0.206858	-3.31786	0.0009071	0.0137679
CCN1	5174.8	0.407935	0.123417	3.30535	0.000948584	0.0142766
PSAPL1	8.60402	0.743499	0.226559	3.2817	0.00103182	0.0153999
AKR1B10	225.245	-0.479089	0.146732	-3.26506	0.00109442	0.0161992
TSPAN15	710.579	0.382777	0.117569	3.25578	0.00113081	0.0164657
ZP1	13.5318	-0.468321	0.143799	-3.25677	0.00112687	0.0164657
ITGB1	9334.66	-0.206539	0.0635422	-3.25042	0.00115235	0.016644
DERL1	3395	-0.179884	0.0554397	-3.24469	0.0011758	0.0167132
LOXL2	311.779	0.318039	0.0980019	3.24523	0.00117356	0.0167132
GREM1	70.0993	0.45709	0.141216	3.23682	0.00120871	0.0170457
COL7A1	1318.77	-0.296605	0.0919281	-3.22649	0.0012532	0.017535
LRRC20	13529.3	0.371011	0.11597	3.19918	0.00137817	0.0191341
CXCL2	761.136	0.447736	0.140153	3.19461	0.00140019	0.0192903
IFI35	196.392	0.197975	0.0620532	3.1904	0.00142076	0.0194242
CEACAM16	7.67865	0.595437	0.187485	3.17592	0.00149362	0.0202657
ABHD15	189.015	-0.208356	0.0658168	-3.16569	0.00154714	0.0204885
ADAMTS7	150.006	0.255414	0.0807554	3.16281	0.00156254	0.0204885
CD163	950.362	-0.529968	0.167321	-3.16738	0.0015382	0.0204885
CORIN	11.8737	-0.550871	0.174311	-3.16028	0.00157619	0.0204885
CYP4X1	296.134	0.252354	0.0798633	3.15982	0.00157868	0.0204885
PLA2G7	7.54691	0.74537	0.235747	3.16173	0.00156832	0.0204885
HBEGF	1349.96	0.339847	0.107717	3.15499	0.00160505	0.0205105
LRRC8D	653.999	-0.330262	0.104738	-3.15323	0.00161473	0.0205105
ZNF22-AS1	24.4457	-0.245055	0.0777052	-3.15365	0.0016124	0.0205105
C1QTNF1	1515.14	-0.282634	0.0897667	-3.14854	0.00164086	0.0206957
TNFRSF1B	1363.63	0.251426	0.0799502	3.14478	0.00166209	0.0208168
SIGLEC9	15.8986	-0.441986	0.140765	-3.13989	0.00169009	0.0210205
CCL21	98.9574	-0.657807	0.20996	-3.13301	0.00173025	0.0213716
PDCD1LG2	82.1128	0.331331	0.105912	3.12837	0.0017578	0.0215632
PROK1	19.4099	0.872548	0.279692	3.11967	0.00181055	0.0220591
DKK2	85.4861	0.613803	0.197247	3.11185	0.00185916	0.0223474
FGF2	214.311	-0.195186	0.0626895	-3.11354	0.00184861	0.0223474
WFIKKN1	74.7083	-0.471269	0.151566	-3.10932	0.00187516	0.0223895
GPX7	198.091	-0.276768	0.0891162	-3.1057	0.00189831	0.0225157
ENDOD1	4212.49	0.291852	0.0941047	3.10136	0.00192636	0.0226981
GBP5	22.9377	0.435118	0.140542	3.096	0.00196152	0.0229613
C5	70.4526	-0.281319	0.0909788	-3.09214	0.00198719	0.0230265
CEMIP	22.5973	0.338023	0.109346	3.0913	0.00199281	0.0230265
IL1RN	24.5339	0.494157	0.160855	3.07206	0.00212587	0.0244066
SERPINA5	2013.98	0.685409	0.223744	3.06336	0.00218866	0.0249675
APLP2	5803.82	-0.104183	0.0340909	-3.05605	0.00224275	0.0254226
S100A4	1610.06	0.411504	0.134784	3.05307	0.00226509	0.0255144
SPRTN	665.875	-0.240017	0.0788781	-3.04288	0.00234325	0.0262298
CCDC80	965.803	0.51044	0.16814	3.0358	0.00239901	0.0265224
PAMR1	183.152	0.404641	0.133237	3.037	0.00238942	0.0265224
TMED5	4206.51	-0.219	0.0721861	-3.03382	0.00241478	0.026533
FAM20C	2284.19	0.326252	0.108307	3.01227	0.002593	0.0283174
HPSE	11.1497	-0.347708	0.116182	-2.99279	0.00276438	0.0298254
IFNAR2	329.247	0.20115	0.0671795	2.99421	0.00275157	0.0298254
NIPSNAP3A	443.243	0.224948	0.0760266	2.9588	0.00308841	0.0331218
KLK10	8.5901	0.479248	0.162138	2.95581	0.00311845	0.0332449
CXCL14	3262.18	0.324031	0.109769	2.95193	0.00315798	0.033291
TECTA	167.493	0.249515	0.0845317	2.95173	0.00315995	0.033291
GOLM1	581.764	0.10471	0.0355651	2.94417	0.00323819	0.0339158
BMP4	320.446	-0.210129	0.0715937	-2.93502	0.00333526	0.0347293
MFGE8	15691.1	-0.262022	0.0898042	-2.9177	0.00352623	0.0365057
C1QTNF7	45.3378	-0.367353	0.126061	-2.91408	0.00356735	0.0367191
TWSG1	489.089	-0.142945	0.049087	-2.91208	0.00359032	0.0367444
CCN5	1310.75	0.33486	0.1153	2.90425	0.00368134	0.0374618
CD14	351.14	-0.333205	0.115133	-2.89409	0.00380261	0.0384772
EFNA1	798.739	0.3025	0.104691	2.88945	0.00385916	0.038654
HMCN2	2396.37	0.321925	0.111427	2.88912	0.00386324	0.038654
SPARCL1	17064.4	-0.161748	0.0561056	-2.88293	0.00394001	0.0392031
ADAMTS18	7.447	0.809229	0.281416	2.87556	0.0040331	0.0399077
QSOX1	5490.46	-0.341952	0.119235	-2.86788	0.00413238	0.0406653
NRG4	202.282	0.404552	0.141196	2.86519	0.00416759	0.0407877
PLAC9	280.818	0.254156	0.088809	2.86183	0.00421209	0.0409992
NPNT	316.607	-0.334478	0.117408	-2.84886	0.00438769	0.0424776
IL6ST	8407.41	-0.23242	0.081681	-2.84546	0.00443467	0.0426411
UQCC3	285.761	0.160403	0.0563965	2.84421	0.0044522	0.0426411
SUMF1	232.515	0.124286	0.0437861	2.83847	0.00453306	0.0431846
CPE	2029	0.207181	0.0732335	2.82905	0.00466866	0.0441914
PDGFA	1260.72	0.259716	0.0918464	2.82772	0.00468809	0.0441914
PRELP	4656.01	-0.38109	0.134901	-2.82496	0.00472861	0.04434
ADAM12	23.5683	0.596732	0.211598	2.82013	0.00480049	0.0447796
ENPP2	604.45	-0.308406	0.109426	-2.8184	0.00482637	0.0447877
CTSK	514.011	-0.292801	0.104008	-2.81518	0.00487496	0.0447978
SPON2	658.208	0.344736	0.122463	2.81502	0.00487748	0.0447978
GDF10	87.5352	0.528966	0.188378	2.808	0.00498502	0.0455337
GLDN	103.599	-0.368074	0.131151	-2.80649	0.00500845	0.0455337
COL14A1	664.74	-0.347082	0.123752	-2.80466	0.005037	0.045562
HYAL1	555.131	-0.281684	0.100687	-2.7976	0.00514832	0.0463349
UCN2	8.8778	-0.415649	0.148742	-2.79443	0.00519919	0.0465588
OLFM1	872.114	0.275198	0.098721	2.78764	0.0053094	0.0473092
SEMA3E	12.1987	-0.434759	0.156385	-2.78006	0.00543481	0.0479495
VWC2L	7.79486	0.816471	0.293608	2.78082	0.00542222	0.0479495
HSPA5	8352.74	0.206958	0.074573	2.77524	0.00551611	0.0484282
FGF22	11.8852	-0.368253	0.132862	-2.7717	0.00557636	0.0487183
TNFSF14	37.7742	0.480212	0.173538	2.76719	0.00565423	0.0491588
ANGPT4	10.2785	0.591566	0.21481	2.7539	0.00588893	0.0504227
CEACAM19	895.125	0.271545	0.09865	2.75261	0.00591221	0.0504227
LYVE1	616.532	-0.336125	0.122036	-2.75432	0.00588149	0.0504227
SPHK2	455.276	-0.192399	0.0698308	-2.75522	0.00586535	0.0504227
MAN2B2	643.018	-0.151953	0.0552788	-2.74885	0.00598042	0.0507627
EMCN	698.142	0.208244	0.0758835	2.74426	0.00606482	0.0512363
PRADC1	2449.62	0.174452	0.0637789	2.73526	0.00623314	0.0521661
TMED4	3712.48	0.121273	0.0443149	2.73661	0.00620763	0.0521661
GNAS	76406.1	0.128238	0.0471948	2.7172	0.00658364	0.0545326
LRRC3B	147.22	0.59965	0.220566	2.71869	0.00655418	0.0545326
WNT6	51.5915	-0.3771	0.138843	-2.71602	0.00660724	0.0545326
IL20RA	59.8662	0.382496	0.141334	2.70632	0.00680325	0.0556375
SUSD1	91.5829	0.191745	0.0708502	2.70635	0.00680275	0.0556375
B4GALT1	3137.26	-0.260306	0.0968683	-2.68721	0.00720509	0.058656
HSD11B1L	270.166	0.169191	0.0632042	2.67689	0.00743085	0.0599489
SMC3	2158.93	-0.146254	0.0546124	-2.67803	0.00740571	0.0599489
GOLGA7B	696.624	-0.324406	0.121639	-2.66695	0.0076543	0.0613003
SHISAL2A	10.3218	-0.463105	0.173682	-2.6664	0.00766682	0.0613003
PLA1A	793.084	-0.475942	0.178701	-2.66335	0.00773677	0.0615847
MGAT5	328.941	-0.122284	0.0459494	-2.66129	0.00778426	0.0616886
COL6A1	9039.44	0.20278	0.0762409	2.65973	0.00782033	0.0617014
NLRC4	82.9034	-0.189281	0.0713916	-2.65131	0.00801802	0.0629836
MSTN	206.605	0.520919	0.196866	2.64605	0.00814366	0.0636913
ANGPTL2	4500.18	0.289125	0.110056	2.62707	0.00861228	0.0667731
CRISPLD2	1559.67	-0.277874	0.105734	-2.62806	0.00858738	0.0667731
FBN2	9.60466	0.554524	0.211526	2.62154	0.00875343	0.0672849
LRIG3	517.965	-0.138837	0.0529307	-2.62299	0.00871609	0.0672849
FGF13	941.581	0.180586	0.0690418	2.6156	0.00890709	0.0676394
GOLM2	1546.41	-0.0963037	0.0368172	-2.61573	0.00890378	0.0676394
VEGFD	885.56	-0.25081	0.095898	-2.61538	0.00891284	0.0676394
ADAMTSL2	367.763	0.512321	0.196041	2.61334	0.00896616	0.0677569
OSTN	44.44	0.616015	0.23609	2.60924	0.00907436	0.0682865
CDAN1	558.234	-0.118979	0.045675	-2.6049	0.00919019	0.0684023
LAMA2	5403.54	-0.233158	0.0895256	-2.60437	0.00920433	0.0684023
PDGFB	970.286	0.239073	0.0917494	2.60572	0.00916821	0.0684023
ANGPTL7	338.449	-0.713747	0.27502	-2.59525	0.0094522	0.0699541
TOR2A	163.604	-0.154222	0.0594979	-2.59205	0.00954055	0.0703174
FGFR4	282.714	0.298875	0.115451	2.58875	0.00963243	0.0704739
NID2	263.962	0.251891	0.0973127	2.58846	0.00964048	0.0704739
DDRGK1	1872.61	-0.195388	0.0757297	-2.58007	0.0098781	0.0719174
ENKD1	391.04	-0.205472	0.0798529	-2.57314	0.0100782	0.0722001
EPDR1	3943.85	0.256771	0.0997459	2.57425	0.0100457	0.0722001
IL16	272.61	-0.234738	0.0911393	-2.5756	0.0100066	0.0722001
KRTCAP3	39.3236	0.271038	0.105165	2.57728	0.00995827	0.0722001
AGPAT3	8974.38	-0.184178	0.0716557	-2.57032	0.0101605	0.0725
CHSY1	809.889	0.188598	0.0735078	2.56569	0.010297	0.0727331
IGFALS	23.9806	-0.264785	0.103336	-2.56236	0.0103962	0.0727331
NID1	3522.27	-0.247984	0.0967337	-2.56357	0.01036	0.0727331
TIMP4	536.735	-0.258121	0.100667	-2.56411	0.010344	0.0727331
TMEM81	180.695	-0.295159	0.115058	-2.56531	0.0103084	0.0727331
RNASET2	199.644	0.181746	0.0712668	2.55022	0.0107656	0.0749559
SCG2	16.2997	0.449465	0.176354	2.54865	0.0108142	0.0749559
SPARC	14366.1	0.164362	0.0645106	2.54783	0.0108395	0.0749559
ATP13A5	12.3904	0.331493	0.130547	2.53927	0.0111084	0.0765198
CXCL1	52.0158	0.504868	0.199451	2.53129	0.0113643	0.0779829
DBI	2174.39	0.253767	0.100546	2.52388	0.0116066	0.0790617
SLC35E3	526.905	0.16517	0.0654453	2.52379	0.0116098	0.0790617
ADAMTS13	351.665	0.185622	0.0736856	2.51911	0.0117651	0.0798155
LGALS3BP	1230.67	0.208785	0.0832355	2.50836	0.0121292	0.081828
PCOLCE2	189.281	-0.401781	0.16027	-2.50691	0.0121793	0.081828
ST3GAL3	3904.53	0.145102	0.0578939	2.50634	0.0121988	0.081828
SCRG1	14.9729	0.368965	0.147375	2.50358	0.0122945	0.0821619
TEX264	1076.73	-0.147255	0.0589436	-2.49824	0.0124812	0.0830995
LIFR	5680.99	-0.233207	0.0935594	-2.4926	0.012681	0.0841174
LYG1	43.0823	-0.227276	0.0914228	-2.48599	0.0129191	0.0853803
DHRS7C	2773.09	0.393037	0.158248	2.48368	0.0130031	0.0855255
PIGR	18.6826	0.581873	0.234488	2.48147	0.0130843	0.0855255
TNFRSF18	11.5649	0.281891	0.113597	2.48149	0.0130835	0.0855255
TGFB2	445.657	0.410945	0.166369	2.47009	0.0135081	0.0879743
LRRC4	66.8791	-0.337261	0.136799	-2.46539	0.0136866	0.0888142
TMCO3	1464.96	-0.170433	0.069187	-2.46337	0.0137637	0.0889918
COL1A2	4084.12	0.341079	0.138886	2.45582	0.0140565	0.0895174
ESAM	1625.63	0.113727	0.0463329	2.45456	0.0141056	0.0895174
GSN	27298.1	-0.128937	0.052493	-2.45627	0.0140386	0.0895174
HTRA3	1511.13	0.189277	0.0769499	2.45975	0.0139036	0.0895174
LRRC39	6368.03	0.361798	0.147375	2.45495	0.0140906	0.0895174
VWA7	594.363	0.243919	0.0994142	2.45356	0.0141449	0.0895174
PEBP4	5335.75	0.333367	0.136007	2.4511	0.0142421	0.0898158
CGA	76.3667	0.889586	0.363262	2.44889	0.0143299	0.090052
GPC3	221.606	-0.345898	0.141883	-2.43791	0.0147724	0.0925081
ADAMTS5	476.838	-0.213964	0.0881295	-2.42784	0.0151891	0.093806
CXCL16	100.649	0.223331	0.0918755	2.4308	0.0150657	0.093806
PENK	42.8802	0.467726	0.192553	2.42908	0.0151373	0.093806
SMOX	244.827	0.200167	0.0824367	2.42813	0.015177	0.093806
MPZL2	299.663	0.383833	0.158216	2.426	0.0152663	0.0939583
CADM3	66.7387	-0.221457	0.0914373	-2.42195	0.0154373	0.0943625
IGSF10	41.7721	-0.330953	0.136611	-2.42259	0.0154102	0.0943625
PLA2G2A	1380.47	-0.52486	0.21706	-2.41804	0.0156045	0.0947748
PTN	69.7336	-0.343198	0.141941	-2.41789	0.0156106	0.0947748
COL6A2	10273	0.196128	0.0812159	2.4149	0.0157395	0.0950891
PRG2	33.6527	0.382879	0.158593	2.41423	0.0157686	0.0950891
CLN5	335.882	-0.11319	0.0470627	-2.40509	0.0161686	0.0965263
EMC10	14553.6	0.308956	0.12833	2.40751	0.0160617	0.0965263
SERPINF2	217.635	-0.362105	0.150537	-2.40542	0.0161537	0.0965263
CEACAM1	81.8748	0.288316	0.120124	2.40016	0.016388	0.0975111
ANGPT1	741.495	0.328644	0.137684	2.38695	0.0169889	0.0976954
ARMCX3	2180.48	-0.142341	0.0594125	-2.39581	0.0165839	0.0976954
AZGP1	43.6702	-0.35393	0.14767	-2.39676	0.0165406	0.0976954
BSG	18461.6	0.156205	0.0654568	2.38638	0.0170151	0.0976954
C1RL	728.704	-0.214717	0.0897733	-2.39177	0.0167675	0.0976954
COL19A1	90.0959	-0.585464	0.244976	-2.38988	0.0168538	0.0976954
COPA	7366.6	-0.125706	0.0525464	-2.39229	0.0167438	0.0976954
IL33	239.527	0.278163	0.116456	2.38856	0.0169144	0.0976954
LGI1	196.801	0.481155	0.20133	2.38988	0.0168539	0.0976954
RNF213	4872.53	-0.151466	0.0633675	-2.39028	0.0168354	0.0976954
VWA5B1	9.27424	-0.642928	0.269425	-2.3863	0.017019	0.0976954
MGAT4A	577.648	-0.112284	0.0471677	-2.38053	0.0172877	0.0989211
ADAM10	1306.56	-0.153587	0.0645928	-2.37777	0.0174176	0.0993468
COL15A1	2267.1	0.349245	0.147062	2.37481	0.0175578	0.0998289
CUZD1	16.3721	0.303877	0.128137	2.37149	0.0177164	0.100412
APOL1	556.776	0.166363	0.0702334	2.36872	0.0178499	0.100849
PRCD	86.6465	-0.162954	0.0690095	-2.36133	0.0182093	0.102556
MYADM	1177.91	0.224407	0.0952806	2.35523	0.0185114	0.103931
VWA1	446.648	0.217671	0.0926709	2.34886	0.0188311	0.105395
HCST	8.61589	0.292615	0.124799	2.34468	0.0190432	0.10625
NRCAM	33.3678	0.338011	0.144252	2.34319	0.0191195	0.106345
NETO2	126.963	0.26822	0.11456	2.34129	0.019217	0.106556
DAG1	12768.2	-0.152005	0.0651277	-2.33396	0.019598	0.108334
IL6	86.4296	0.4624	0.198985	2.32379	0.0201366	0.110628
NTN1	315.194	-0.14306	0.0615558	-2.32407	0.0201217	0.110628
ENTPD5	1057.19	0.117886	0.0508416	2.3187	0.0204114	0.111794
RELN	97.1202	-0.334257	0.14425	-2.3172	0.0204928	0.111898
AMH	115.475	-0.258645	0.111809	-2.31327	0.0207076	0.112727
NRP1	2744.39	0.218015	0.0943021	2.31188	0.0207844	0.112802
LOXL1	275.028	-0.195967	0.0850947	-2.30293	0.021283	0.11516
C1QBP	3856.28	0.110665	0.048173	2.29724	0.0216051	0.116195
CHI3L1	657.225	0.618517	0.269356	2.29628	0.0216599	0.116195
PIGO	565.688	-0.155909	0.0679011	-2.29612	0.021669	0.116195
GZMB	15.2572	0.347657	0.151564	2.2938	0.0218018	0.116211
SIGLEC1	523.376	-0.212821	0.0927621	-2.29426	0.0217753	0.116211
SLC35F6	1367.14	-0.210424	0.0919917	-2.28742	0.0221712	0.11783
TM9SF3	3774.08	-0.11706	0.0512216	-2.28535	0.0222921	0.118122
VCAN	784.603	0.245372	0.107421	2.28422	0.0223589	0.118126
LRRTM4	37.9551	0.351993	0.154439	2.27917	0.0226571	0.11935
FAS	175.741	0.160238	0.0704591	2.27419	0.0229543	0.120561
ANGPTL8	11.2131	-0.484893	0.213336	-2.27291	0.0230317	0.120613
ADAM28	29.3702	0.329589	0.145215	2.26966	0.0232281	0.121008
ADIPOR2	4478.49	-0.125548	0.0553822	-2.26695	0.0233935	0.121008
C17orf67	26.7982	0.213257	0.0940074	2.26851	0.0232982	0.121008
FANK1	9.88906	0.278763	0.123014	2.26611	0.0234448	0.121008
FUCA2	304.588	-0.0987841	0.0435681	-2.26735	0.0233688	0.121008
ERP27	13.5297	0.252704	0.111599	2.26438	0.0235505	0.121204
SEL1L	4379.4	-0.154764	0.0684023	-2.26256	0.0236627	0.121234
SMOC2	2287.85	0.264427	0.116895	2.26209	0.0236917	0.121234
CXCL12	2919.2	0.221917	0.0983386	2.25666	0.0240293	0.122263
LRCH3	2156.38	-0.0911488	0.0403874	-2.25686	0.0240168	0.122263
AGT	2311.59	-0.212806	0.0946809	-2.24762	0.0246006	0.124815
HSD17B11	548.395	-0.156056	0.0694653	-2.24653	0.0246703	0.124815
MR1	231.774	-0.141822	0.0633532	-2.2386	0.0251822	0.127046
EYS	30.622	-0.224047	0.100178	-2.23648	0.0253202	0.127384
C1QTNF9	71.3176	0.287444	0.129442	2.22064	0.026375	0.132318
APOB	74.6821	0.334696	0.150959	2.21714	0.0266138	0.13313
COL1A1	2732.15	0.333502	0.150491	2.21609	0.0266855	0.13313
C1R	3431.14	-0.19695	0.0890523	-2.21163	0.0269925	0.133916
DHRS3	2956.68	0.15803	0.0714422	2.212	0.0269668	0.133916
FCGR3A	98.619	-0.27157	0.122976	-2.20833	0.0272216	0.133939
PRSS35	9.27186	0.415907	0.188174	2.21022	0.0270896	0.133939
TULP3	677.854	-0.11855	0.0536746	-2.20867	0.0271975	0.133939
CLEC1A	165.17	0.155798	0.0706161	2.20626	0.0273657	0.134279
ANOS1	1434.41	0.253455	0.11517	2.20071	0.0277564	0.135824
FAM20A	228.449	0.19258	0.087569	2.19918	0.027865	0.135984
GALNT15	3786.46	-0.395686	0.180487	-2.19233	0.028356	0.13763
NGRN	22383.1	0.109128	0.0497759	2.19239	0.0283511	0.13763
INHBE	102.104	0.434187	0.198205	2.1906	0.0284811	0.137864
C14orf93	250.944	-0.116085	0.0531151	-2.18553	0.02885	0.139039
LRP8	79.5257	0.287899	0.131754	2.18513	0.0288792	0.139039
SPATA6	181.318	-0.145616	0.0667984	-2.17993	0.0292624	0.140507
CD163L1	35.5721	0.246646	0.113199	2.17887	0.0293411	0.140508
CGREF1	233.59	-0.282606	0.129794	-2.17734	0.0294548	0.140676
ACE	462.666	0.309993	0.142499	2.17541	0.0295998	0.140993
CFD	4771.69	0.181082	0.0834266	2.17055	0.0299648	0.142353
DIPK2A	306.747	-0.124864	0.0577914	-2.1606	0.0307263	0.145584
TMEM181	1413.44	-0.118308	0.0548017	-2.15883	0.0308635	0.145848
CXCL11	9.94091	0.579859	0.269624	2.15063	0.0315058	0.148492
TFPI2	68.1195	0.327346	0.152384	2.14816	0.0317008	0.149019
GNPTAB	1708.18	0.131564	0.0614134	2.14226	0.0321723	0.150734
ITGAV	2952.94	-0.126839	0.0592293	-2.1415	0.0322341	0.150734
CXCL9	54.8025	0.436289	0.204241	2.13615	0.0326672	0.152362
ZBED3	300.473	-0.170248	0.0798256	-2.13275	0.0329453	0.15326
NECTIN4	9.48753	0.335917	0.157686	2.13028	0.0331482	0.153804
SEMA3G	1242.27	0.20633	0.0969433	2.12835	0.0333078	0.154146
GPAT4	4616.07	-0.170484	0.0802718	-2.12384	0.0336839	0.155085
SPINK1	11.4277	0.636884	0.29975	2.12472	0.0336102	0.155085
GPX3	28802.8	-0.251725	0.118608	-2.12232	0.0338111	0.155271
HAPLN2	73.6635	-0.210245	0.0991209	-2.1211	0.0339134	0.155343
DDR1	3475.11	-0.194973	0.0921892	-2.11493	0.0344362	0.156934
PLXNB1	545.113	-0.167749	0.0793038	-2.11527	0.0344068	0.156934
PNKD	1151.01	0.122348	0.0579619	2.11084	0.0347857	0.158125
ABHD14A	694.214	0.175146	0.0831797	2.10564	0.0352359	0.158561
ADAMTS9	1602.89	0.297496	0.141234	2.1064	0.0351695	0.158561
MST1L	18.2357	0.266681	0.126577	2.10686	0.0351296	0.158561
STMN3	196.354	0.162204	0.0769227	2.10866	0.0349738	0.158561
CPA4	14.6896	0.450881	0.214356	2.10342	0.0354287	0.15903
EMILIN2	143.146	-0.187846	0.089366	-2.10198	0.0355548	0.159197
C1orf54	132.878	0.137593	0.0656896	2.0946	0.0362067	0.161324
RIPK2	94.8064	0.121046	0.0577905	2.09456	0.03621	0.161324
PCYOX1	4297.67	0.193938	0.0927102	2.09188	0.0364497	0.161685
TSKU	613.649	-0.282363	0.134997	-2.09163	0.0364718	0.161685
DLL4	892.052	0.159985	0.0767048	2.08573	0.0370034	0.163637
QSOX2	626.81	-0.169933	0.0815156	-2.08467	0.0370995	0.163658
XDH	37.5	0.530832	0.254788	2.08342	0.0372126	0.163754
CTSD	29872.7	-0.215319	0.103444	-2.08151	0.0373876	0.16412
COL5A1	960.351	0.216745	0.104232	2.07944	0.037577	0.16438
EVA1A	15.9687	0.279093	0.134253	2.07886	0.0376302	0.16438
FXYD6	433.046	0.113894	0.0548212	2.07756	0.0377501	0.164502
AIMP1	2783.13	0.0856093	0.0412463	2.07556	0.0379343	0.164567
ENOX2	463.119	-0.0973554	0.0469315	-2.07442	0.0380407	0.164567
PAPPA2	17.8723	0.369323	0.178004	2.0748	0.0380051	0.164567
CGB7	48.6581	0.310448	0.150178	2.06719	0.0387161	0.164802
CREG1	3289.27	0.149754	0.0724517	2.06695	0.0387391	0.164802
DGLUCY	6918.96	0.15577	0.07516	2.07251	0.0382184	0.164802
DHRS9	10.4613	0.394336	0.19038	2.07131	0.0383301	0.164802
LGALS3	1915.47	0.121327	0.0586494	2.06868	0.038576	0.164802
PDZD2	670.567	0.133988	0.0647884	2.06809	0.0386313	0.164802
S100A13	2793.17	0.202201	0.0977536	2.06847	0.0385955	0.164802
HPSE2	20.5543	-0.355839	0.172408	-2.06393	0.0390244	0.165623
CX3CL1	1246.54	0.224713	0.109107	2.05957	0.0394398	0.16699
DNASE1	315.033	-0.166706	0.081051	-2.0568	0.0397056	0.167088
LCN10	214.867	-0.387588	0.188478	-2.05641	0.0397428	0.167088
LGALS9	231.225	0.164901	0.0801808	2.05661	0.0397234	0.167088
SCT	66.8698	0.432222	0.210925	2.04918	0.040445	0.169642
CD99L2	13602.8	-0.145725	0.071165	-2.0477	0.0405892	0.169849
APOC1	139.163	0.226031	0.110612	2.04346	0.0410065	0.170426
EPHB6	267.358	-0.13887	0.0679803	-2.0428	0.0410718	0.170426
SLC35F5	1862.35	0.120577	0.0590355	2.04244	0.0411077	0.170426
TMEM204	785.296	-0.133546	0.0653414	-2.04383	0.0409708	0.170426
LAMC1	10279.7	-0.0973839	0.0477091	-2.0412	0.0412309	0.170542
FICD	153.137	-0.210739	0.103384	-2.03841	0.041509	0.171297
P4HA2	538.779	-0.170171	0.083642	-2.03451	0.0419	0.172117
TMED3	171.739	0.147181	0.0723265	2.03496	0.0418553	0.172117
CD177	21.7841	-0.439033	0.216195	-2.03073	0.0422827	0.173291
NRN1L	33.7026	0.184092	0.0907451	2.02867	0.0424923	0.173629
TXNDC12	920.375	-0.113299	0.0558672	-2.02801	0.0425591	0.173629
A2ML1	18.1935	0.322423	0.15935	2.02336	0.0430361	0.174068
ASPN	351.244	0.299592	0.148408	2.01871	0.0435178	0.174068
B2M	20772.2	0.0883981	0.0438349	2.01662	0.0437357	0.174068
C1QC	308.668	-0.241757	0.119658	-2.02041	0.0433407	0.174068
IL32	2007.56	0.299544	0.148533	2.01668	0.0437291	0.174068
LPL	9448.22	-0.30322	0.150045	-2.02086	0.0432939	0.174068
POSTN	871.416	-0.304393	0.150272	-2.02561	0.0428045	0.174068
SERPING1	6137.56	-0.135814	0.0672465	-2.01964	0.0434211	0.174068
SPOCK2	465.235	-0.193459	0.0958909	-2.01749	0.0436444	0.174068
TNXB	2486.74	0.238391	0.11807	2.01906	0.0434808	0.174068
TUFT1	188.596	-0.149695	0.0739742	-2.02362	0.0430097	0.174068
NDNF	211.37	0.188692	0.0937293	2.01316	0.0440977	0.17512
PEF1	1494.9	-0.145851	0.0725257	-2.01103	0.0443226	0.175623
MMRN2	1653.55	0.106946	0.0538115	1.98741	0.0468764	0.185333
ANGPTL4	1093.04	-0.36935	0.186468	-1.98077	0.0476173	0.185717
GBGT1	112.594	-0.137244	0.0693976	-1.97765	0.0479685	0.185717
GOLT1B	1046.93	-0.106449	0.053697	-1.98241	0.0474339	0.185717
LCN6	121.645	-0.336301	0.169974	-1.97855	0.0478669	0.185717
MYOC	1733.47	-0.31367	0.158366	-1.98067	0.0476285	0.185717
PDZD11	529.383	0.0955531	0.0483481	1.97636	0.0481142	0.185717
ROBO4	1090.94	0.127967	0.0644623	1.98514	0.0471287	0.185717
SLIT2	386.496	-0.218535	0.110374	-1.97996	0.0477083	0.185717
SNCA	19.8286	-0.205496	0.103868	-1.97843	0.0478806	0.185717
SPATA20	2068.44	0.164158	0.0830591	1.9764	0.04811	0.185717
TGOLN2	5497.38	-0.0945159	0.0477392	-1.97984	0.0477215	0.185717
TFF3	25.8901	-0.295034	0.149793	-1.96961	0.0488833	0.18828
DNASE1L2	21.9383	-0.222081	0.113014	-1.96507	0.0494062	0.189885
C1QB	366.558	-0.253143	0.129116	-1.96058	0.0499285	0.191072
IL17D	3203.95	0.400316	0.204172	1.96068	0.0499165	0.191072
PAM	10109.9	0.16812	0.0860017	1.95484	0.0506018	0.193236
ERO1A	949.968	0.106877	0.0547947	1.9505	0.0511163	0.194786
SEMA5B	50.5789	0.323342	0.166034	1.94745	0.0514813	0.195345
TMX1	709.953	-0.123576	0.0634413	-1.94787	0.0514303	0.195345
ISLR2	112.032	0.235072	0.120799	1.94598	0.051657	0.195598
CLDND1	1548.6	-0.0865225	0.0445275	-1.94313	0.0520009	0.196484
HHIPL1	41.4682	0.152339	0.0786091	1.93793	0.0526323	0.198035
IFIH1	151.365	0.145585	0.0751103	1.93828	0.0525887	0.198035
BACE2	636.72	0.141346	0.0731566	1.9321	0.0533467	0.198834
CRISP3	7.52035	0.548968	0.283816	1.93424	0.053084	0.198834
ELAPOR1	9.39978	0.291432	0.15082	1.93232	0.0533203	0.198834
MIA3	2693.53	-0.105013	0.0543637	-1.93167	0.0533998	0.198834
SUSD4	161.655	0.329702	0.170565	1.933	0.0532358	0.198834
ADPGK	618.015	-0.112239	0.0582091	-1.92821	0.0538289	0.198876
CLCF1	61.1383	0.19282	0.0999329	1.9295	0.0536691	0.198876
HLA-DRB1	1948.36	0.16182	0.0838889	1.92898	0.0537331	0.198876
SAMD1	1738.08	-0.192426	0.099806	-1.928	0.0538552	0.198876
SLAMF6	9.05586	-0.238218	0.123841	-1.92357	0.054408	0.200206
YIPF5	583.826	-0.0875904	0.0455411	-1.92333	0.0544391	0.200206
SFTPB	42.1195	0.404475	0.211134	1.91572	0.0554002	0.203061
VTCN1	13.9259	0.33175	0.173202	1.91539	0.0554422	0.203061
CNPY3	419.637	-0.0883926	0.0462793	-1.90998	0.0561358	0.204969
JAML	39.5857	0.211568	0.110839	1.90879	0.0562895	0.204969
PGAP3	603.002	0.117646	0.0616669	1.90777	0.0564207	0.204969
SNX24	393.795	0.0862377	0.0451919	1.90825	0.0563583	0.204969
PI15	59.0931	0.228683	0.120199	1.90254	0.0571001	0.207017
SCUBE1	97.5915	-0.319229	0.168027	-1.89986	0.057451	0.207158
TMEM205	1194.65	0.0895388	0.0470926	1.90134	0.057258	0.207158
VIP	31.1279	-0.206553	0.108735	-1.8996	0.0574861	0.207158
COL3A1	3954.55	0.276839	0.145807	1.89868	0.0576071	0.207177
GASK1A	124.229	-0.26441	0.139416	-1.89656	0.0578866	0.207765
CTSV	20.9813	-0.202492	0.106896	-1.89429	0.0581866	0.208424
PRRT3	137.425	-0.195117	0.103119	-1.89215	0.0584704	0.209023
C7	374.381	-0.254597	0.134748	-1.88943	0.0588337	0.209903
EPOR	257.227	-0.168572	0.0893118	-1.88745	0.0590998	0.210433
PIANP	18.1015	-0.226424	0.120447	-1.87986	0.0601275	0.213667
IGIP	783.876	-0.108831	0.0579495	-1.87804	0.0603762	0.213947
WLS	613.697	-0.11063	0.058923	-1.87753	0.060445	0.213947
IL17RB	130.592	-0.125551	0.0669268	-1.87594	0.0606631	0.214295
CDNF	641.126	0.129856	0.0693533	1.87239	0.0611529	0.2156
GALNT14	11.7816	0.270327	0.144646	1.86889	0.0616377	0.216457
NUCB2	908.671	0.13103	0.0700962	1.86929	0.0615826	0.216457
TNFRSF25	125.242	0.148505	0.0796628	1.86418	0.062297	0.218344
SFTPC	25.0083	0.474765	0.254822	1.86313	0.0624444	0.218433
C16orf89	13.7536	-0.328427	0.176901	-1.85656	0.0633741	0.221253
SIGLEC14	10.2137	-0.306157	0.165133	-1.85401	0.0637382	0.222092
JAM3	548.866	-0.105524	0.0569473	-1.85301	0.0638807	0.222156
C15orf61	1205.43	0.126772	0.0685463	1.84944	0.0643943	0.222216
LIN7B	776.971	0.126992	0.0686602	1.84958	0.0643745	0.222216
MAMDC2	436.746	-0.151478	0.0818363	-1.85099	0.0641716	0.222216
SOGA1	789.594	-0.0931345	0.0503025	-1.85149	0.0640992	0.222216
LEPR	265.597	-0.189957	0.102801	-1.84782	0.0646288	0.22258
SNX25	863.786	-0.107061	0.0579648	-1.84699	0.0647482	0.22258
ASIP	12.6829	-0.360096	0.195445	-1.84244	0.0654109	0.223998
SCGB2B2	31.0177	0.142968	0.0775762	1.84293	0.0653386	0.223998
IL4I1	11.3287	0.301872	0.16421	1.83833	0.066014	0.225423
PPT1	1128.76	0.082228	0.0447612	1.83704	0.0662045	0.225423
TAOK2	2655.13	-0.0666283	0.0362682	-1.8371	0.0661949	0.225423
CCDC126	392.908	-0.119932	0.0654816	-1.83154	0.0670202	0.227129
FGF9	80.9531	0.292356	0.159736	1.83025	0.0672129	0.227129
IGFBP7	4590.21	0.123871	0.0676768	1.83033	0.067201	0.227129
NMB	56.1439	-0.134229	0.0732948	-1.83136	0.0670475	0.227129
LRFN3	575.87	-0.157721	0.0862942	-1.82771	0.0675929	0.227983
TXNDC16	256.832	-0.124606	0.0683126	-1.82405	0.0681438	0.229409
CILP2	23.4521	-0.560498	0.307943	-1.82013	0.0687387	0.230978
RAET1E	53.9145	-0.331964	0.182768	-1.81632	0.069322	0.232501
BAG6	17508.2	-0.0879389	0.0484928	-1.81344	0.0697639	0.232676
PAPPA	75.2384	-0.187832	0.103505	-1.81472	0.0695671	0.232676
SRPX2	340.164	0.136573	0.0753093	1.8135	0.0697547	0.232676
LAD1	332.096	0.307423	0.169686	1.81172	0.0700302	0.23313
SLC39A9	801.503	-0.0758899	0.0419798	-1.80777	0.0706422	0.234731
BMP3	9.60176	-0.499585	0.27724	-1.80199	0.0715463	0.235185
CHADL	56.4269	0.189642	0.105296	1.80103	0.0716978	0.235185
FCER2	9.89493	0.310975	0.172283	1.80502	0.0710717	0.235185
GABBR1	1040.12	-0.0960501	0.0533137	-1.8016	0.0716078	0.235185
PTHLH	9.06349	0.371946	0.206456	1.80158	0.0716117	0.235185
SDC4	6370	-0.189063	0.104828	-1.80356	0.0713005	0.235185
SH2D3A	88.3382	-0.16034	0.0888418	-1.80478	0.0711091	0.235185
ATRAID	3235.22	0.077353	0.0430374	1.79734	0.0722813	0.236665
IL1RAP	112.42	-0.184126	0.102561	-1.79527	0.0726099	0.237307
SERPINE2	289.514	0.283434	0.15818	1.79185	0.0731577	0.238228
SLC29A3	75.7305	-0.16712	0.0932544	-1.79209	0.073119	0.238228
GLIPR1L1	7.56653	0.187235	0.10471	1.78813	0.0737548	0.239737
CLMP	224.487	-0.135073	0.0756299	-1.78597	0.0741041	0.240436
SFT2D2	974.187	-0.110945	0.0621499	-1.78512	0.0742427	0.24045
PCSK5	255.334	-0.136357	0.0765112	-1.78219	0.0747187	0.241555
ADAMTS4	2011.51	0.334064	0.188123	1.77577	0.0757709	0.242331
LRRC17	89.7855	0.151022	0.0850293	1.77612	0.0757139	0.242331
MMRN1	116.442	-0.304169	0.171079	-1.77794	0.075413	0.242331
NAA60	1468.58	0.0983326	0.055325	1.77736	0.0755086	0.242331
SCPEP1	887.112	0.133626	0.0751032	1.77923	0.0752026	0.242331
TMC2	15.3604	-0.297141	0.167306	-1.77604	0.075727	0.242331
RTN4R	26.7986	0.261228	0.147823	1.76717	0.0771994	0.24646
MFAP2	51.3399	-0.214854	0.121735	-1.76493	0.0775763	0.247223
NTF3	59.5693	0.224406	0.127234	1.76373	0.0777772	0.247423
LRRC28	909.24	0.0841205	0.0478226	1.75901	0.0785755	0.249077
SORL1	141.432	0.142857	0.0811875	1.7596	0.0784763	0.249077
ABRAXAS1	425.897	0.127146	0.072333	1.75779	0.078784	0.249297
CBLN3	53.7075	0.13929	0.0793229	1.75598	0.0790913	0.249828
DPP4	145.358	-0.234022	0.133586	-1.75185	0.0798001	0.250549
LTBP4	5764.18	0.153406	0.0876726	1.74976	0.0801589	0.250549
SOD3	738.343	-0.168666	0.0962309	-1.75273	0.0796491	0.250549
TCTN3	579.89	-0.0815557	0.0465708	-1.75122	0.0799082	0.250549
TIMMDC1	4268.31	0.0972303	0.0555673	1.74978	0.080157	0.250549
VASH1	244.283	0.102284	0.0584308	1.75052	0.0800287	0.250549
KRTDAP	25.6083	0.304388	0.174136	1.748	0.0804647	0.251067
HLA-B	8904.19	0.0954797	0.0547623	1.74353	0.081241	0.252499
SEZ6L	13.4649	-0.31812	0.182521	-1.74293	0.0813467	0.252499
SFRP4	296.185	0.377873	0.21665	1.74417	0.0811303	0.252499
FNDC1	304.346	0.353579	0.203332	1.73892	0.0820483	0.25393
TLL2	79.6998	0.304628	0.175207	1.73868	0.0820914	0.25393
IL18BP	286.936	0.0984837	0.0567395	1.73571	0.0826143	0.255107
ADAM32	18.2164	0.191029	0.110216	1.73323	0.0830552	0.255149
CCN4	26.7932	0.23156	0.133521	1.73426	0.0828712	0.255149
PVR	1639.99	0.200801	0.11581	1.73388	0.0829395	0.255149
MESD	704.887	0.0665239	0.0384102	1.73194	0.0832851	0.255417
BTC	18.3392	0.22271	0.128726	1.73011	0.0836098	0.255974
ZG16B	24.9396	0.52404	0.303424	1.72709	0.0841519	0.257195
RNF5	2093.9	0.100801	0.0584505	1.72455	0.0846088	0.257711
ST3GAL2	1713.12	0.116125	0.0673306	1.72469	0.0845827	0.257711
AMY2A	19.8135	0.412773	0.239959	1.72018	0.0853991	0.257896
HABP2	35.5623	0.269658	0.156789	1.71988	0.0854548	0.257896
LRRN3	331.948	-0.37579	0.21848	-1.72002	0.0854285	0.257896
PROS1	391.096	-0.118705	0.0689027	-1.72279	0.0849261	0.257896
SEMA4D	7308.09	0.117191	0.0681565	1.71945	0.0855333	0.257896
TBL2	563.745	-0.103329	0.060088	-1.71963	0.0854994	0.257896
HILPDA	154.955	0.188471	0.109666	1.71859	0.0856886	0.25793
TNFRSF14	486.847	0.0874345	0.0509445	1.71627	0.0861125	0.258771
C8G	174.362	0.279739	0.163624	1.70964	0.0873323	0.261997
ACRBP	20.4052	-0.173138	0.101822	-1.70039	0.0890575	0.262339
APOM	110.007	0.138981	0.0815704	1.70382	0.088415	0.262339
F5	19.2909	-0.215817	0.126544	-1.70548	0.0881058	0.262339
FCRLB	7.67695	0.253977	0.148849	1.70628	0.0879565	0.262339
HMCN1	452.481	0.135244	0.0795116	1.70093	0.0889557	0.262339
KIF7	140.437	0.130646	0.0768292	1.70048	0.0890411	0.262339
MUC5AC	10.0572	0.343389	0.201534	1.70388	0.0884042	0.262339
PIGS	2519.59	0.073303	0.0429705	1.70589	0.0880284	0.262339
SLC35A5	336.154	-0.0923943	0.0543001	-1.70155	0.0888398	0.262339
ST3GAL1	7848.76	-0.143969	0.0846091	-1.70158	0.0888342	0.262339
VWC2	12.1771	0.373432	0.219248	1.70324	0.088523	0.262339
C1QA	294.104	-0.194134	0.114235	-1.69942	0.0892397	0.262444
FAM180A	20.1038	-0.259819	0.153344	-1.69435	0.0901984	0.264139
FJX1	74.3691	0.206531	0.121806	1.69557	0.0899674	0.264139
TNFRSF21	466.49	0.120814	0.071317	1.69404	0.0902584	0.264139
PZP	37.3207	0.151934	0.0899633	1.68885	0.091249	0.266602
PROM2	89.0655	-0.134768	0.0799039	-1.68662	0.0916755	0.267412
BOLA3	922.003	0.121581	0.0722769	1.68216	0.0925385	0.26885
DRAM2	941.787	0.067924	0.0404038	1.68113	0.0927378	0.26885
EDN1	394.121	0.235787	0.140309	1.68048	0.0928632	0.26885
LBP	1090.84	0.38958	0.231852	1.6803	0.0928999	0.26885
MANF	427.036	0.117793	0.070107	1.6802	0.0929192	0.26885
HAPLN3	517.649	-0.205624	0.122792	-1.67457	0.0940189	0.271593
BMP1	1080.21	-0.131244	0.0784344	-1.67329	0.0942698	0.27188
GLMP	193.906	0.0985348	0.0589184	1.67239	0.0944467	0.271952
ADGRE5	1859.36	0.106559	0.0638618	1.66859	0.0951983	0.2728
AGRN	603.279	0.109126	0.0653933	1.66877	0.0951629	0.2728
TMEM43	5019.12	-0.172238	0.103174	-1.6694	0.0950391	0.2728
P4HA3	15.7833	0.240251	0.144119	1.66703	0.0955079	0.27325
ADAM23	554.702	0.196319	0.118203	1.66085	0.0967426	0.274746
CR1	32.6903	-0.216701	0.130662	-1.65849	0.0972192	0.274746
DHRS7B	1342.7	0.105954	0.0638692	1.65893	0.0971305	0.274746
FNDC4	227.137	0.271201	0.163057	1.66323	0.096266	0.274746
GPN2	1019.31	-0.103022	0.0620616	-1.65999	0.0969166	0.274746
MMP11	60.537	-0.144912	0.0873503	-1.65897	0.0971214	0.274746
MT-RNR1	97440.4	-0.131095	0.0788508	-1.66257	0.0963985	0.274746
PLAUR	113.804	0.161746	0.0975738	1.65768	0.0973821	0.274746
SFTPA1	17.0153	0.457876	0.276239	1.65753	0.0974114	0.274746
OLFML2B	325.414	0.217949	0.131849	1.65303	0.0983249	0.276887
SLAMF7	8.8659	0.269251	0.163282	1.649	0.0991479	0.278704
SMOC1	963.692	-0.181722	0.110245	-1.64835	0.0992816	0.278704
CLEC3B	303.236	0.195119	0.118604	1.64513	0.0999437	0.279537
ITGBL1	72.2542	-0.214048	0.130102	-1.64523	0.0999233	0.279537
PDCD6IP	5252.17	-0.100348	0.0610651	-1.64329	0.100323	0.279537
PHYHIPL	27.8536	0.243166	0.147924	1.64386	0.100206	0.279537
REG1A	59.0399	0.602136	0.36646	1.64312	0.100359	0.279537
TMEM41A	681.63	0.0875114	0.0533411	1.6406	0.10088	0.280554
ALKBH7	2830.12	0.117631	0.0718212	1.63783	0.101456	0.281706
ENAM	233.852	-0.222913	0.136476	-1.63335	0.102396	0.281706
FKRP	1231.2	-0.0858097	0.0524586	-1.63576	0.10189	0.281706
GRN	2987.34	0.0595801	0.0364547	1.63436	0.102184	0.281706
ITGA4	25.6055	0.180367	0.110329	1.63481	0.102089	0.281706
TCN2	287.624	-0.0963358	0.0588516	-1.63693	0.101646	0.281706
VEGFB	4202.98	0.135418	0.0828957	1.63359	0.102344	0.281706
GPC4	1638.56	0.146258	0.089747	1.62967	0.103171	0.283404
REG1B	21.322	0.688875	0.423155	1.62795	0.103535	0.283969
LGR6	26.6352	-0.209095	0.128625	-1.62563	0.104029	0.284019
PSPN	40.7503	-0.138215	0.0849689	-1.62666	0.10381	0.284019
TDRD10	105.255	-0.101454	0.0623894	-1.62614	0.10392	0.284019
IGF1	135.293	0.20275	0.124898	1.62333	0.104519	0.284921
ALB	76.7244	0.409936	0.252842	1.62131	0.104951	0.285663
FAM151A	8.49564	0.377569	0.233081	1.6199	0.105253	0.286051
C1QTNF6	255.915	-0.163099	0.100969	-1.61534	0.106237	0.288288
ADGRF3	10.5186	-0.167668	0.103898	-1.61378	0.106574	0.28833
LRRC25	146.935	0.237628	0.147228	1.61401	0.106525	0.28833
ANO8	1073.28	-0.105411	0.0653892	-1.61205	0.10695	0.288841
SIGLEC11	8.41455	-0.201782	0.125219	-1.61143	0.107086	0.288841
GHR	5499.57	-0.13125	0.0816187	-1.60809	0.107816	0.289503
ITGAL	68.4797	0.162642	0.101123	1.60836	0.107756	0.289503
TMED7	1977.46	-0.0798843	0.0496401	-1.60927	0.107557	0.289503
LTA	13.0974	-0.254492	0.158375	-1.60689	0.108078	0.289771
ADGRA3	2507.24	-0.133866	0.0835064	-1.60306	0.108921	0.290918
GDF9	40.8304	0.178928	0.111634	1.60281	0.108977	0.290918
IL11RA	988.033	0.125376	0.0782261	1.60274	0.108993	0.290918
ATG16L1	1902.12	-0.0976619	0.0610195	-1.6005	0.109487	0.291154
IL31RA	39.3254	0.413485	0.258357	1.60044	0.109501	0.291154
LAMB3	315.451	0.300439	0.187758	1.60013	0.109569	0.291154
IGFBP5	41368.3	0.189458	0.118477	1.5991	0.109797	0.291329
FGF1	150.265	0.188717	0.118145	1.59733	0.110193	0.291946
VASH2	35.5566	0.199675	0.125087	1.59629	0.110423	0.292124
GDF15	101.051	0.274838	0.172356	1.5946	0.110802	0.292694
HLA-E	11168.3	0.0829954	0.0521459	1.5916	0.111474	0.294036
DOLK	329.627	-0.120338	0.075835	-1.58684	0.112548	0.294343
MPZL1	1112.91	0.0676995	0.0425714	1.59026	0.111777	0.294343
SCUBE2	340.077	0.239859	0.151006	1.5884	0.112195	0.294343
SIAE	1437.09	0.0901856	0.0568379	1.58672	0.112577	0.294343
THEM6	614.256	0.113095	0.0712316	1.5877	0.112353	0.294343
TNFRSF19	169.968	0.204677	0.128843	1.58857	0.112157	0.294343
CCER2	60.4549	0.169188	0.106729	1.5852	0.11292	0.29481
YBX1	50897.7	0.0660503	0.0417501	1.58204	0.113641	0.296261
EXOC3-AS1	286.173	0.130954	0.0829099	1.57947	0.114228	0.296926
LINGO4	1783.58	0.139394	0.0882135	1.58019	0.114063	0.296926
SPOCK3	11.3671	0.433674	0.275074	1.57657	0.114895	0.298228
FABP5	591.423	0.110222	0.0699455	1.57583	0.115066	0.298239
CYB5R1	24714.7	0.117224	0.074558	1.57226	0.115891	0.299943
TNFRSF6B	289.193	0.18377	0.117035	1.57021	0.116366	0.300737
LCN12	9.96718	-0.223912	0.142777	-1.56826	0.11682	0.301403
PARM1	1617.85	0.140183	0.0894214	1.56766	0.11696	0.301403
FCGBP	85.1226	-0.232506	0.14866	-1.56402	0.117814	0.302655
MEGF9	967.983	-0.0895874	0.0572779	-1.56408	0.117799	0.302655
MMP2	4154.94	-0.153485	0.0981724	-1.56342	0.117953	0.302655
LOXL3	83.9384	0.113086	0.0724064	1.56183	0.118329	0.303186
CRLF1	769.943	0.133562	0.085636	1.55965	0.118843	0.304067
CCNL1	3060.18	0.142669	0.091823	1.55374	0.120246	0.306346
TMEM108	517.346	0.213386	0.137291	1.55426	0.120122	0.306346
TSPAN13	498.95	0.122442	0.0787332	1.55515	0.119911	0.306346
KCP	37.04	0.152795	0.0984013	1.55278	0.120477	0.306478
ST6GALNAC1	47.7011	-0.163821	0.105549	-1.55209	0.12064	0.306478
SCIMP	10.2659	-0.172648	0.111408	-1.54969	0.121216	0.30742
TOR1B	705.535	-0.110304	0.0712044	-1.54911	0.121355	0.30742
ANGPTL5	17.2997	-0.319377	0.207178	-1.54156	0.123181	0.310429
C22orf46	784.685	0.1095	0.0710216	1.54179	0.123125	0.310429
ITIH5	1315.15	0.151273	0.0981137	1.54181	0.123119	0.310429
PLA2G12A	2228.48	0.0878825	0.0570172	1.54133	0.123236	0.310429
TNC	888.729	0.301916	0.196029	1.54016	0.123521	0.310712
CHPF	1055.18	-0.115589	0.0751566	-1.53798	0.124053	0.311084
ISG15	210.089	0.138217	0.0899871	1.53596	0.124548	0.311084
ITFG1	1805.21	0.0786791	0.0513145	1.53327	0.125209	0.311084
LRSAM1	1238.8	0.092744	0.0604113	1.53521	0.124732	0.311084
PCOLCE	525.055	0.185851	0.121117	1.53448	0.124913	0.311084
PDGFC	402.34	0.135364	0.088201	1.53472	0.124853	0.311084
SLIT3	905.678	-0.148253	0.0966969	-1.53318	0.125233	0.311084
UXS1	1034.19	0.0922229	0.0599812	1.53753	0.124164	0.311084
VIT	747.241	-0.128379	0.0836643	-1.53445	0.124919	0.311084
SEZ6L2	57.0707	0.133967	0.0876853	1.52781	0.126559	0.313942
MXRA5	195.24	0.346103	0.226881	1.52548	0.127139	0.314077
SLC22A15	66.0213	-0.131139	0.0859497	-1.52577	0.127068	0.314077
WFDC1	42.0827	-0.227753	0.149174	-1.52676	0.126821	0.314077
FAM3C	654.099	-0.0502851	0.0330949	-1.51942	0.128656	0.316516
GPC6	66.114	-0.184121	0.121155	-1.51971	0.128583	0.316516
SFRP2	259.269	0.303061	0.199294	1.52067	0.128342	0.316516
ARSI	22.0189	0.293508	0.193332	1.51816	0.128975	0.316864
CHST8	8.88468	-0.175995	0.115987	-1.51738	0.129172	0.316913
VSTM4	612.352	0.105564	0.0696247	1.51618	0.129473	0.317218
COMTD1	751.374	-0.10947	0.0723233	-1.51362	0.130121	0.318371
CCL14	392.253	-0.169419	0.11214	-1.51078	0.130844	0.319703
OVCH1	11.0592	-0.206133	0.136603	-1.50899	0.131301	0.320382
IL17RE	59.3838	-0.104558	0.0694647	-1.5052	0.132272	0.321883
PNLIPRP1	9.92242	0.623358	0.41414	1.50519	0.132276	0.321883
AEBP1	2285.3	-0.163746	0.109329	-1.49774	0.134201	0.325248
FAM3A	1610.39	0.0591859	0.039517	1.49773	0.134203	0.325248
NEGR1	486.487	-0.110945	0.0740135	-1.49899	0.133877	0.325248
WNT5A	173.435	0.184671	0.123477	1.49559	0.134761	0.326158
POGLUT1	315.362	-0.113927	0.076254	-1.49404	0.135164	0.326692
LTBP2	2814.85	-0.125703	0.0843837	-1.48966	0.136313	0.329024
PTGDS	1748.63	0.204494	0.137621	1.48592	0.137301	0.330963
ASAH2	30.6709	0.195388	0.131593	1.48479	0.137599	0.331146
LAMA4	1025.83	0.137261	0.0924796	1.48424	0.137747	0.331146
EDEM2	340.055	-0.121236	0.0817556	-1.48291	0.138098	0.331547
THSD4	304.604	0.203245	0.137232	1.48103	0.138599	0.332303
BDNF	59.3494	-0.396111	0.267614	-1.48016	0.138831	0.332416
RIC3	531.366	0.105415	0.0713349	1.47775	0.139476	0.333513
TLR8	11.3646	-0.205648	0.139258	-1.47674	0.139745	0.333711
ADAMTS19	60.3747	0.256837	0.174085	1.47535	0.140118	0.334157
ADCK1	615.972	-0.113678	0.0771879	-1.47274	0.140821	0.334514
MATN3	18.7167	-0.188409	0.127813	-1.4741	0.140455	0.334514
SPON1	83.523	-0.226592	0.154005	-1.47133	0.141202	0.334514
TMED6	9.81272	-0.155934	0.105913	-1.47228	0.140945	0.334514
TMEM182	3249.42	0.230887	0.156861	1.47193	0.141041	0.334514
SYNGR2	12269	0.101251	0.0690973	1.46533	0.14283	0.337923
FOLR2	127.597	-0.166048	0.113452	-1.4636	0.143304	0.338532
IGSF8	714.096	-0.0779901	0.0533584	-1.46163	0.143843	0.338532
PI16	487.346	0.246539	0.168671	1.46166	0.143834	0.338532
ST3GAL5	1284.19	0.118697	0.0811921	1.46193	0.143761	0.338532
SGCE	318.264	-0.0878375	0.0601282	-1.46084	0.14406	0.338598
ITGA5	2501.39	-0.0998501	0.068384	-1.46014	0.144252	0.338605
RETSAT	6210.35	-0.164988	0.113065	-1.45923	0.144501	0.338745
FLT1	3333.71	0.112595	0.0772219	1.45807	0.14482	0.339049
MSRB3	5114.2	0.0989008	0.0679298	1.45593	0.145413	0.339994
TIMP1	941.237	0.151942	0.104432	1.45493	0.145689	0.340194
CLPS	47.7285	0.617587	0.425142	1.45266	0.146318	0.341218
ZDHHC4	1342.02	0.0694964	0.0478816	1.45142	0.146662	0.341576
FNDC5	8981.15	0.200253	0.138054	1.45054	0.146908	0.341704
ADM5	97.348	-0.155351	0.10749	-1.44526	0.148386	0.34429
COL4A6	263.113	-0.145554	0.100716	-1.44519	0.148404	0.34429
PRR4	168.603	0.104229	0.0721661	1.4443	0.148656	0.344428
NTM	33.3347	0.196424	0.136252	1.44163	0.149407	0.345722
BMPER	247.181	0.132326	0.0919669	1.43884	0.150195	0.347096
DCN	17587.5	-0.113497	0.0790045	-1.43659	0.150835	0.347852
RELL2	14.1065	-0.153051	0.106557	-1.43632	0.150911	0.347852
CHST12	731.389	-0.0620527	0.0433241	-1.43229	0.15206	0.350051
GDF11	297.269	-0.116524	0.081424	-1.43108	0.152408	0.350402
CLDN1	85.9512	-0.285711	0.200162	-1.4274	0.153464	0.352377
C9orf47	18.0953	-0.178671	0.125752	-1.42082	0.15537	0.356297
HLA-A	7302.17	0.0886067	0.0624844	1.41806	0.156173	0.35768
PLA2G1B	16.1516	0.457174	0.322918	1.41576	0.156846	0.358762
CALCOCO1	15822.4	-0.0951745	0.0673927	-1.41224	0.15788	0.360667
PNLIPRP2	13.4017	0.586417	0.415906	1.40997	0.158547	0.36173
SPOCK1	2120.49	0.183432	0.130227	1.40855	0.158967	0.362226
HLA-G	23.1105	0.152362	0.108295	1.40691	0.159453	0.362412
PRG4	827.295	-0.30587	0.217387	-1.40703	0.159418	0.362412
NGF	21.1953	-0.157545	0.112279	-1.40315	0.160571	0.36449
CASP4	313.378	0.107851	0.0770332	1.40006	0.161495	0.366124
BTNL8	13.1426	0.258175	0.184493	1.39937	0.161701	0.366127
KLK3	8.07202	0.519523	0.371776	1.39741	0.162291	0.366998
FUT8	231.365	-0.0641258	0.0460129	-1.39365	0.163423	0.369093
RNASE6	40.6395	-0.167639	0.120418	-1.39215	0.163878	0.369189
TMEM123	1404.49	-0.0689325	0.0494938	-1.39275	0.163695	0.369189
C4B	32.6357	-0.225599	0.162593	-1.38751	0.165287	0.371428
CD9	2066.61	-0.0979474	0.0705812	-1.38773	0.165221	0.371428
CBLN1	33.228	-0.189849	0.136976	-1.386	0.165746	0.371995
CD8A	17.4084	0.200875	0.145412	1.38142	0.16715	0.374676
CPB1	84.1288	0.339747	0.246213	1.37989	0.16762	0.375259
C3orf33	244.902	0.0835129	0.0605686	1.37882	0.167952	0.375462
SUFU	1001.89	0.100856	0.0731778	1.37824	0.16813	0.375462
NCSTN	2953.33	-0.05926	0.0430508	-1.37651	0.168663	0.375716
SLC30A5	726.447	-0.0585278	0.0425038	-1.377	0.168512	0.375716
CLEC11A	108.796	0.114544	0.083331	1.37456	0.169267	0.376592
SBSN	56.7094	0.222343	0.162361	1.36944	0.170863	0.379673
PRKCSH	3871.61	-0.0480802	0.0351642	-1.36731	0.171529	0.380362
THBS1	2344.72	-0.232066	0.169752	-1.36709	0.171598	0.380362
APOO	788.263	0.112549	0.0827516	1.36008	0.173806	0.381795
BGLAP	92.0432	0.129148	0.0950823	1.35827	0.174377	0.381795
CETP	14.7445	-0.252755	0.185356	-1.36362	0.172686	0.381795
CNTNAP3	37.8773	-0.114987	0.0845152	-1.36055	0.173656	0.381795
ECE2	258.412	-0.200447	0.147471	-1.35923	0.174075	0.381795
F11R	722.907	0.0908167	0.0667192	1.36118	0.173458	0.381795
HEG1	1482.82	0.0914781	0.0670619	1.36408	0.172541	0.381795
MST1	217.434	0.103654	0.0761223	1.36168	0.1733	0.381795
NXPE3	5286.57	0.116766	0.0859353	1.35876	0.174223	0.381795
S100A8	368.429	0.223594	0.164517	1.3591	0.174116	0.381795
WNT3	13.6765	0.150922	0.111455	1.3541	0.175704	0.384232
HDGFL2	3528.19	-0.073024	0.054096	-1.3499	0.177049	0.385922
IGKV1-5	8.00612	-0.336815	0.249454	-1.35021	0.176949	0.385922
IL21R	7.6171	0.260392	0.192931	1.34967	0.177123	0.385922
CKLF	86.0722	0.0760069	0.0564251	1.34704	0.177967	0.387289
SUMF2	2500.3	0.0661595	0.0491787	1.34529	0.178532	0.388048
OTOGL	15.1942	-0.13449	0.100274	-1.34123	0.179845	0.389955
TMEM234	139.442	-0.0776689	0.057903	-1.34136	0.179803	0.389955
R3HCC1L	591.387	-0.0770665	0.0575128	-1.33999	0.180249	0.390358
SLC49A3	117.551	0.0696978	0.0520664	1.33863	0.18069	0.390841
CTSL	2719.4	0.0884135	0.0661161	1.33725	0.181142	0.390875
MUC2	9.28602	0.269671	0.201612	1.33757	0.181036	0.390875
CMA1	11.2846	0.27244	0.204728	1.33074	0.183274	0.392294
CTRB2	31.2473	0.448429	0.337023	1.33056	0.183334	0.392294
F13A1	842.445	-0.182699	0.137003	-1.33354	0.182355	0.392294
FNDC3B	3457.34	-0.135152	0.101545	-1.33096	0.183202	0.392294
PLOD3	919.164	-0.075392	0.0565785	-1.33252	0.182689	0.392294
PRF1	72.9516	0.152527	0.114508	1.33202	0.182854	0.392294
STX1A	101.492	-0.105062	0.0787763	-1.33368	0.182309	0.392294
NBEAL2	1224.43	-0.0671402	0.0505641	-1.32782	0.184237	0.393757
SFTPA2	22.6931	0.315877	0.238266	1.32573	0.184928	0.394762
SEMA4B	737.07	0.157295	0.119009	1.32171	0.186266	0.397145
A1BG	41.1014	0.136159	0.103134	1.32021	0.186765	0.397153
HSP90B1	6078.67	0.0705462	0.0535093	1.31839	0.187372	0.397153
MOXD1	26.2651	0.192903	0.146154	1.31986	0.186881	0.397153
PRSS53	82.824	0.115649	0.0877208	1.31838	0.187378	0.397153
SNORC	18.0354	-0.132216	0.100281	-1.31846	0.18735	0.397153
MMP25	34.2383	-0.185077	0.140766	-1.31478	0.188584	0.399236
RMDN2	185.525	-0.108889	0.0828732	-1.31392	0.188873	0.399376
NOG	156.864	0.197455	0.15037	1.31313	0.18914	0.39947
SHBG	21.3544	0.147769	0.112621	1.3121	0.189486	0.399729
CORT	7.91756	-0.16183	0.123485	-1.31052	0.190019	0.400382
TMIGD3	11.9399	-0.247289	0.188922	-1.30895	0.190553	0.401034
ALK	13.8981	-0.233794	0.179461	-1.30276	0.192658	0.404989
MUC5B	24.5624	0.223667	0.171815	1.30179	0.192988	0.405207
OLFML3	426.203	0.12375	0.0951642	1.30038	0.193469	0.405742
P4HB	14831.9	0.0683075	0.0525779	1.29917	0.193886	0.40614
CPA2	23.5561	0.515263	0.397037	1.29777	0.194365	0.406669
PODN	1197.68	-0.133052	0.102661	-1.29603	0.194967	0.407451
SLIT1	37.3125	-0.130564	0.100806	-1.2952	0.195252	0.407571
MIA	7.33884	-0.247291	0.191563	-1.29091	0.196734	0.410188
SERINC2	3973.27	-0.127774	0.0991447	-1.28876	0.197481	0.411265
CEL	81.6349	0.226359	0.17631	1.28387	0.199186	0.414335
ISLR	1002.89	0.161416	0.12582	1.2829	0.199526	0.41456
CCL27	14.3573	-0.110754	0.0868529	-1.27519	0.202243	0.418566
COL11A2	210.88	0.147465	0.115512	1.27662	0.201736	0.418566
PRLR	13.1268	-0.152266	0.119418	-1.27507	0.202284	0.418566
SIL1	1616.13	-0.08914	0.069926	-1.27478	0.202389	0.418566
MTCH1	6496.49	-0.0783511	0.0615061	-1.27387	0.202708	0.418742
FGFR2	17.661	0.158064	0.124331	1.27132	0.203616	0.419799
RDH13	630.726	0.101644	0.0799641	1.27111	0.203688	0.419799
COL11A1	37.5818	-0.297069	0.233893	-1.27011	0.204047	0.420055
NOTUM	279.632	0.196473	0.155009	1.2675	0.204978	0.421487
CPAMD8	405.959	-0.136161	0.107799	-1.2631	0.206554	0.42424
TXNDC15	1663.53	0.0492908	0.0390873	1.26104	0.207293	0.425271
DKK3	619.508	0.107106	0.0851284	1.25817	0.208329	0.426419
TMUB2	1653.29	0.070597	0.0560875	1.25869	0.208141	0.426419
COQ10A	4948.99	0.167053	0.132954	1.25647	0.208946	0.427195
HYAL3	25.8333	0.124592	0.0993696	1.25383	0.209905	0.428665
CSMD1	64.9559	0.249561	0.199517	1.25082	0.210999	0.430409
GPC1	12349.4	0.0803761	0.0645561	1.24506	0.213111	0.432745
IL24	130.881	0.201133	0.161435	1.2459	0.2128	0.432745
INTS1	9900.01	-0.0762992	0.061264	-1.24542	0.212979	0.432745
VASN	448.745	0.0962673	0.0772769	1.24574	0.212858	0.432745
CSF2RA	10.9577	0.131912	0.106049	1.24389	0.213541	0.433128
POGLUT2	46.4052	0.0906035	0.0728914	1.24299	0.21387	0.433305
DGAT2	171.298	-0.174903	0.14092	-1.24115	0.214549	0.434178
LINGO1	49.3919	-0.116029	0.0935328	-1.24051	0.214786	0.434178
VSIR	1140.37	0.078628	0.0634293	1.23962	0.215117	0.434358
HLA-DRA	2214.12	0.111211	0.089795	1.2385	0.21553	0.4347
ASAH1	5281.87	0.0872199	0.0705749	1.23585	0.216515	0.434997
DNAJC3	1293.44	-0.0632303	0.0511626	-1.23587	0.216507	0.434997
OSTM1	1493.01	-0.0940857	0.0761526	-1.23549	0.216648	0.434997
TDGF1	18.5396	-0.376586	0.304453	-1.23693	0.216115	0.434997
CES3	2276.68	0.124971	0.101479	1.2315	0.218136	0.436717
F3	492.64	-0.143741	0.116807	-1.23058	0.218481	0.436717
FGF6	240.459	0.274923	0.223402	1.23062	0.218465	0.436717
GPN3	1481.82	0.057265	0.0464852	1.2319	0.217988	0.436717
DNAJB11	937.491	-0.0825902	0.0671941	-1.22913	0.219023	0.437314
CHIT1	30.9804	0.224717	0.183238	1.22637	0.22006	0.438894
PILRA	123.481	0.124733	0.102042	1.22237	0.221568	0.441411
GHITM	17298.2	0.0640017	0.0524893	1.21933	0.222719	0.44272
RMDN3	1099.55	-0.0653296	0.0535606	-1.21973	0.222566	0.44272
SEMA3B	494.539	0.116803	0.0959392	1.21747	0.223427	0.443633
FGFR3	54.3977	-0.11316	0.0931671	-1.21459	0.224523	0.445317
EDIL3	83.2302	-0.168274	0.138698	-1.21324	0.225038	0.445843
LUM	850.499	0.217821	0.18015	1.20911	0.22662	0.447494
NLGN1	27.3504	-0.136616	0.112966	-1.20936	0.226525	0.447494
SEMA6B	546.861	0.116633	0.0964202	1.20964	0.226419	0.447494
IGHG3	42.203	-0.281182	0.232745	-1.20811	0.227004	0.447759
FGF7	285.67	0.187428	0.155318	1.20673	0.227536	0.448314
LGI3	12.0338	-0.212689	0.176516	-1.20493	0.22823	0.449187
HS3ST2	28.0517	0.171197	0.142209	1.20384	0.228652	0.449523
IGKJ1	7.97438	0.252462	0.210063	1.20184	0.229425	0.450549
ACP3	7.72913	0.223315	0.18619	1.1994	0.230374	0.45154
SECTM1	109.389	0.142054	0.118453	1.19924	0.230434	0.45154
IMPG2	26.3341	-0.126099	0.105273	-1.19783	0.230984	0.452123
BMP8B	62.7394	-0.0897568	0.0750217	-1.19641	0.231537	0.452624
CLU	2125.69	-0.11769	0.0984137	-1.19587	0.231746	0.452624
CPVL	332.168	0.159464	0.133441	1.19502	0.232079	0.452783
MUC1	57.8993	0.130996	0.109722	1.19389	0.232521	0.453151
CSF3	901.958	-0.227611	0.191008	-1.19163	0.233407	0.454138
YME1L1	8247.48	0.0462003	0.0387814	1.1913	0.233535	0.454138
LILRB1	28.2978	0.122076	0.102534	1.19059	0.233815	0.454149
LNX1	234.629	-0.090103	0.075717	-1.19	0.234048	0.454149
SIDT2	2502.62	-0.0590187	0.0497597	-1.18608	0.235593	0.456652
SFTA2	7.75081	0.266756	0.225042	1.18536	0.235875	0.456705
ENOX1	192.418	-0.141152	0.11921	-1.18407	0.236387	0.456708
IGLV2-14	10.3275	0.301105	0.254277	1.18416	0.236349	0.456708
TMEM107	32.3482	-0.0882804	0.0746803	-1.18211	0.237162	0.457712
DHRS11	567.048	-0.0629794	0.0533495	-1.1805	0.2378	0.457956
HPX	21.228	-0.142269	0.120461	-1.18104	0.237588	0.457956
ENPP6	13.2631	-0.184086	0.156066	-1.17954	0.238184	0.458204
DNER	73.6654	-0.196068	0.166432	-1.17806	0.238772	0.458842
CLEC4E	16.7115	-0.199036	0.169466	-1.17449	0.240198	0.460761
EGFLAM	2811.98	0.0977503	0.0832431	1.17427	0.240285	0.460761
BTD	386.713	0.0846229	0.0722514	1.17123	0.241507	0.462608
IGFBP2	595.032	0.0877473	0.0750246	1.16958	0.24217	0.463383
MMP9	29.7622	0.202611	0.17337	1.16866	0.24254	0.463596
PLTP	843.52	-0.122104	0.104922	-1.16376	0.244521	0.466884
ADA2	278.529	0.101429	0.0875785	1.15815	0.246803	0.467001
CCL28	11.8119	0.142545	0.122679	1.16193	0.245262	0.467001
EMILIN1	749.072	0.0626147	0.054052	1.15842	0.246694	0.467001
GP2	73.7218	0.478355	0.411488	1.1625	0.245032	0.467001
LRRC3	40.7661	-0.0994173	0.0856298	-1.16101	0.245637	0.467001
LTBP3	5084.77	0.0522524	0.0451292	1.15784	0.246929	0.467001
MTRNR2L10	8.75658	-0.146369	0.126074	-1.16097	0.245654	0.467001
PROK2	13.0119	-0.21758	0.187598	-1.15982	0.246123	0.467001
TPSD1	28.9465	0.215387	0.186011	1.15792	0.246896	0.467001
BOC	615.316	0.107592	0.0931038	1.15562	0.247837	0.467731
LAPTM4A	5058.93	0.0304198	0.026314	1.15603	0.247669	0.467731
PSAP	60203.3	0.087453	0.0757415	1.15462	0.248244	0.468006
ADAMTS6	22.9901	0.137444	0.119364	1.15147	0.24954	0.469499
CSF1	1055.24	0.0837715	0.0727551	1.15142	0.249561	0.469499
RCN1	1514.59	-0.0748319	0.0650607	-1.15019	0.250067	0.469959
GLT8D1	860.677	-0.0462921	0.0403129	-1.14832	0.250837	0.47091
ITGB2	205.091	-0.108094	0.0946829	-1.14164	0.253603	0.475463
KITLG	411.579	0.0959135	0.0840472	1.14119	0.253793	0.475463
CNPY4	129.371	0.0837296	0.073524	1.13881	0.254784	0.476821
DEFB124	20.8497	0.168703	0.148377	1.13699	0.255542	0.47726
FCAR	14.1004	-0.186441	0.163981	-1.13697	0.255551	0.47726
STK32B	50.4181	0.112419	0.098944	1.13619	0.255877	0.47737
ARFIP2	907.234	-0.0626119	0.0552329	-1.1336	0.256963	0.47857
ARTN	22.6762	-0.131321	0.115896	-1.13309	0.257178	0.47857
HVCN1	197.816	0.10147	0.0895788	1.13274	0.257322	0.47857
AIF1L	735.614	-0.0858299	0.0758768	-1.13118	0.257981	0.478956
MTRNR2L8	289.823	-0.133457	0.118038	-1.13063	0.258211	0.478956
WFDC2	17.4621	-0.17443	0.154316	-1.13034	0.258331	0.478956
PMEL	12.626	0.171112	0.151691	1.12803	0.259308	0.48027
COL12A1	2122.92	0.111062	0.0985341	1.12714	0.259682	0.480466
SH3BP5L	2366.71	0.0670388	0.0595166	1.12639	0.260001	0.480559
ZP3	55.1863	-0.244448	0.217264	-1.12512	0.260539	0.481056
IL4R	688.332	0.101084	0.0899147	1.12422	0.26092	0.481264
STARD3NL	579.771	0.0488117	0.0434745	1.12277	0.261537	0.481905
ESM1	12.5778	0.212323	0.189345	1.12135	0.262138	0.482517
C2	113.267	0.128506	0.114921	1.11821	0.263477	0.484484
MMP19	111.347	0.0997904	0.089399	1.11624	0.264321	0.485537
IL7R	50.5906	-0.117552	0.105692	-1.11222	0.266045	0.488203
C6orf120	817.754	0.0633612	0.0571443	1.10879	0.26752	0.489082
CCL5	41.7808	0.147386	0.13291	1.10892	0.267466	0.489082
OLFML1	177.619	0.131116	0.118158	1.10966	0.267145	0.489082
THPO	72.6013	-0.0992959	0.0895712	-1.10857	0.267616	0.489082
DEFA3	17.4604	-0.34117	0.308089	-1.10738	0.268132	0.489525
C1QTNF3	100.293	0.142071	0.128392	1.10654	0.268492	0.489683
HSPB6	39763.2	0.126976	0.114846	1.10562	0.268892	0.489914
NTN4	568.053	0.0895286	0.0810554	1.10454	0.269361	0.490269
ADAMTS12	108.8	0.0728904	0.0660334	1.10384	0.269662	0.490319
IGHA2	45.4988	0.208352	0.189718	1.09822	0.272108	0.494266
FLRT1	22.0342	-0.154534	0.141026	-1.09578	0.273174	0.495694
IGSF1	80.9819	0.250393	0.228637	1.09516	0.273448	0.495694
MBTPS1	2447.72	-0.0448936	0.0410444	-1.09378	0.27405	0.495782
MPEG1	162.495	-0.107631	0.0983996	-1.09382	0.274036	0.495782
CANT1	1105.72	-0.0571012	0.0523738	-1.09026	0.275598	0.497577
CXCL8	45.7808	0.184757	0.169374	1.09082	0.275352	0.497577
CDH24	95.0641	-0.111955	0.103049	-1.08642	0.277291	0.498164
CXADR	9.03298	0.191056	0.176062	1.08517	0.277848	0.498164
DLK2	10.824	-0.120826	0.111348	-1.08512	0.277871	0.498164
GNLY	156.34	0.168519	0.155212	1.08574	0.277596	0.498164
MASP1	342.095	-0.202488	0.186251	-1.08718	0.276958	0.498164
MATN2	288.878	-0.149258	0.137512	-1.08542	0.277736	0.498164
SLC25A25	6740.88	0.144314	0.132927	1.08566	0.27763	0.498164
NPPB	14.2701	0.260339	0.240214	1.08378	0.278461	0.498724
CCL4	14.0217	0.168584	0.156029	1.08046	0.279935	0.500863
CSGALNACT1	297.974	0.0677025	0.0628002	1.07806	0.281007	0.501778
LAMA1	16.5303	-0.20479	0.189886	-1.07849	0.280815	0.501778
CCDC3	1954.75	0.151052	0.140371	1.0761	0.281884	0.501871
ERVH48-1	12.6127	-0.128876	0.119766	-1.07606	0.2819	0.501871
IGLC2	30.0382	0.204918	0.190219	1.07727	0.281359	0.501871
IL1RL1	225.871	0.237118	0.220564	1.07505	0.282351	0.502176
SEC11A	3873.92	-0.0432212	0.0402546	-1.0737	0.282959	0.502757
TG	148.652	-0.206778	0.192885	-1.07203	0.283706	0.503585
NDUFB11	8349.28	0.0641691	0.0601866	1.06617	0.286347	0.50777
TEX261	5015.37	0.0547255	0.0513768	1.06518	0.286795	0.50806
DNASE1L3	17.9497	-0.133944	0.125826	-1.06452	0.287094	0.508089
MT-RNR2	849869	-0.0742551	0.0699149	-1.06208	0.2882	0.509542
NCEH1	519.01	-0.0909388	0.0857211	-1.06087	0.28875	0.51001
TMEM161A	2332.47	-0.079864	0.0754213	-1.05891	0.289642	0.511083
CNPY2	750.613	-0.0549438	0.0519864	-1.05689	0.290562	0.511195
LOX	225.464	-0.114276	0.108047	-1.05765	0.290216	0.511195
OLFM4	46.8356	0.134754	0.127426	1.05751	0.29028	0.511195
IGHV3-74	7.40996	-0.186524	0.176604	-1.05617	0.29089	0.511271
GPAT3	2661.09	0.120279	0.113994	1.05514	0.291363	0.511599
LRRN4CL	295.72	0.0860006	0.0817671	1.05178	0.292903	0.513799
CHI3L2	42.9774	0.220172	0.209511	1.05089	0.293311	0.514011
GDPD2	7.64028	0.160003	0.152357	1.05018	0.293634	0.514074
COL4A5	972.825	-0.0887859	0.0848847	-1.04596	0.29558	0.516472
SCN2B	509.309	0.231814	0.22159	1.04614	0.295498	0.516472
SSC5D	306.399	0.145545	0.139265	1.04509	0.295981	0.516668
COL20A1	18.872	-0.242892	0.233046	-1.04225	0.297296	0.518459
PCSK4	45.5009	-0.111379	0.10722	-1.03879	0.298903	0.520755
APLN	362.694	0.260122	0.251043	1.03617	0.300125	0.522375
SEC22C	1350.13	-0.0558636	0.0540193	-1.03414	0.30107	0.523512
DPY19L2	56.6615	0.0856507	0.0831243	1.03039	0.302826	0.525724
FAM20B	2918.42	-0.0664263	0.0644809	-1.03017	0.30293	0.525724
FCN1	57.193	0.130122	0.12676	1.02652	0.304645	0.527949
MRI1	356.657	0.062677	0.0610773	1.02619	0.304801	0.527949
DCD	14.9875	-0.207682	0.202802	-1.02406	0.305805	0.528346
EDA2R	193.946	-0.18042	0.176162	-1.02417	0.305756	0.528346
SSBP3-AS1	64.3911	0.0844768	0.0825105	1.02383	0.305915	0.528346
PTGDR	19.8494	0.113623	0.111474	1.01927	0.308075	0.531562
CYP20A1	217.909	-0.0530436	0.0522458	-1.01527	0.309977	0.534096
FCN3	206.224	-0.221333	0.218077	-1.01493	0.31014	0.534096
ERBB3	248.235	0.173787	0.171378	1.01406	0.310556	0.5343
GALNT2	5659.49	-0.0746209	0.0737267	-1.01213	0.311477	0.535369
FMOD	913.327	-0.135064	0.133704	-1.01017	0.312412	0.536462
ECRG4	162.383	0.118559	0.117518	1.00886	0.313043	0.53703
ANXA1	1794.26	0.0738857	0.0734716	1.00564	0.314591	0.538633
KRT10	1129.54	0.087813	0.087373	1.00504	0.314879	0.538633
MPZL3	39.8834	0.0998247	0.099215	1.00615	0.314346	0.538633
LY96	32.051	-0.0811562	0.0809052	-1.0031	0.315811	0.539712
ACSL5	230.665	0.0521204	0.0521106	1.00019	0.317219	0.541601
BDH2	486.767	-0.0447667	0.0450857	-0.992924	0.320747	0.54451
BRD9	1629.45	0.0417474	0.0420363	0.993128	0.320648	0.54451
EFNA4	36.5997	-0.0930342	0.0935979	-0.993977	0.320234	0.54451
FGG	23.1288	-0.366422	0.368801	-0.993549	0.320442	0.54451
IL17RA	359.855	-0.0715535	0.0718613	-0.995716	0.319388	0.54451
SELENOP	1468.55	0.0556576	0.0559974	0.993932	0.320256	0.54451
CD300LG	798.43	-0.100817	0.101917	-0.989206	0.322563	0.546556
GPNMB	1087.37	0.0889144	0.0898317	0.989789	0.322277	0.546556
PLXDC1	644.187	0.0840001	0.0850215	0.987987	0.323159	0.546877
SMPD1	2182.93	0.0460789	0.0466589	0.987571	0.323363	0.546877
JAM2	518.058	0.0807018	0.0818645	0.985797	0.324233	0.547761
LAMB2	9590.25	0.0535877	0.0543895	0.985258	0.324497	0.547761
CFAP36	560.671	-0.047509	0.0483882	-0.981829	0.326184	0.549918
PKDCC	8590.56	-0.0714896	0.0728436	-0.981413	0.326389	0.549918
IL15	351.951	0.0656717	0.0669924	0.980285	0.326945	0.550337
TSPAN18	407.259	0.0749571	0.0765851	0.978743	0.327707	0.550763
VKORC1	525.168	-0.0457838	0.0467884	-0.978528	0.327813	0.550763
PCDHGA12	81.9976	0.110337	0.112914	0.977174	0.328483	0.551371
CCN3	194.121	0.198322	0.203104	0.976455	0.328839	0.551452
LRP10	4694.65	-0.0774802	0.0794638	-0.975038	0.329541	0.551597
PRSS36	45.4184	-0.0787185	0.0807197	-0.975208	0.329457	0.551597
TNFSF10	621.5	0.0768976	0.0789167	0.974414	0.329851	0.5516
B4GALT4	415.618	-0.0477769	0.0490948	-0.973156	0.330476	0.552129
ADAM9	2491.54	-0.0532517	0.05507	-0.966982	0.333553	0.555199
CRTAP	5129.47	-0.054485	0.0562956	-0.967837	0.333126	0.555199
CYP4F12	62.4779	-0.103334	0.106821	-0.967354	0.333367	0.555199
TMEM50B	2145.98	-0.0452505	0.0467693	-0.967525	0.333282	0.555199
TAFA5	84.5146	-0.182175	0.189008	-0.963847	0.335123	0.557293
CD59	17828.9	0.0482009	0.0501626	0.960892	0.336607	0.559242
SFTPD	8.30389	0.133395	0.138917	0.960247	0.336931	0.559261
ADAMTS3	37.1873	0.125729	0.131814	0.95384	0.340165	0.563584
CHAD	452.493	0.169836	0.177941	0.954453	0.339855	0.563584
SERPINA1	120.181	-0.128894	0.135502	-0.951232	0.341487	0.565252
CLEC14A	1595.54	0.05108	0.0537444	0.950424	0.341897	0.565408
BAIAP2L2	66.3414	-0.0824459	0.086894	-0.948811	0.342717	0.566242
LCAT	463.378	-0.0651107	0.0690327	-0.943187	0.345585	0.570455
PRSS8	8.00543	0.146124	0.155634	0.938897	0.347784	0.573555
CD209	86.5379	0.122801	0.13101	0.937344	0.348582	0.574342
FURIN	6355.72	-0.10095	0.107795	-0.936498	0.349017	0.574531
DHRS13	22.8892	0.0903117	0.0966556	0.934366	0.350115	0.575041
FAM180B	34.6517	0.187436	0.200675	0.934027	0.35029	0.575041
NTF4	216.483	0.107473	0.11502	0.934389	0.350103	0.575041
C1QTNF12	22.9518	-0.0918646	0.0984479	-0.933129	0.350753	0.575238
NSUN2	3690.02	-0.0455774	0.048874	-0.93255	0.351053	0.575238
CD164	6816.1	-0.072201	0.0776674	-0.929618	0.352569	0.575616
COL25A1	116.107	-0.184863	0.19872	-0.930269	0.352232	0.575616
FLT4	437.112	-0.0528847	0.0568365	-0.930471	0.352127	0.575616
LTF	91.9218	-0.100831	0.108441	-0.929827	0.352461	0.575616
PGF	405.381	-0.0974719	0.104965	-0.928614	0.353089	0.575941
GNRH1	91.5509	0.0696135	0.0750315	0.927791	0.353516	0.576112
ADAM17	602.889	-0.0644597	0.0695791	-0.926423	0.354226	0.576221
STC1	249.629	-0.15021	0.162103	-0.926632	0.354118	0.576221
SORD	170.305	0.0689813	0.0745634	0.925136	0.354895	0.576786
TGFA	12.3984	0.109985	0.119063	0.923751	0.355616	0.577433
NBL1	1071.85	0.0531744	0.0576183	0.922874	0.356073	0.577651
COMP	653.658	-0.250876	0.272396	-0.920997	0.357052	0.578191
IL1R2	50.9402	-0.167215	0.181492	-0.921337	0.356875	0.578191
FGF10	28.3353	-0.116643	0.127026	-0.91826	0.358483	0.579984
ELN	1345.87	-0.118701	0.129703	-0.915175	0.3601	0.582074
MMP24	21.5008	0.0834955	0.0913318	0.9142	0.360612	0.582377
CRISPLD1	23.5937	-0.194934	0.213901	-0.911327	0.362123	0.584
EXTL2	328.682	0.0653561	0.0717371	0.91105	0.362269	0.584
APH1B	358.125	-0.0539175	0.0593676	-0.908198	0.363774	0.584321
CCL13	10.0026	0.183062	0.201499	0.908502	0.363613	0.584321
ENPP5	736.057	-0.102765	0.113039	-0.909113	0.36329	0.584321
IGLV1-51	10.7062	0.131714	0.144861	0.909243	0.363222	0.584321
FREM1	106.318	0.10695	0.118194	0.904867	0.365536	0.586626
CHGA	8.06958	-0.186553	0.207068	-0.900928	0.367627	0.589138
ERP44	1431.57	-0.0430167	0.0477931	-0.900061	0.368088	0.589138
SDF2	846.625	-0.0425667	0.0472833	-0.900247	0.367989	0.589138
ADGRB1	21.1981	0.113499	0.126403	0.897908	0.369234	0.589153
CTRC	19.6108	0.230284	0.256562	0.897574	0.369413	0.589153
DMKN	67.692	0.125321	0.139456	0.898636	0.368847	0.589153
WFIKKN2	77.0704	0.134305	0.149391	0.899017	0.368643	0.589153
FAM131A	906.941	-0.0570206	0.063686	-0.895339	0.370606	0.590529
EFEMP2	1096.66	0.0574188	0.0644838	0.890438	0.373231	0.593215
GH1	57.736	0.286272	0.321264	0.891082	0.372885	0.593215
IGLC1	29.0431	0.195601	0.219845	0.889721	0.373616	0.593215
VMO1	132.085	0.269837	0.303256	0.889802	0.373572	0.593215
WDR82	7296.71	-0.0472666	0.0532929	-0.886923	0.375121	0.595076
C6	58.4441	-0.131822	0.149134	-0.883915	0.376742	0.597119
RSPRY1	851.052	-0.0373938	0.0423514	-0.882943	0.377267	0.597423
ADAMTSL4	4940.48	-0.104357	0.118365	-0.881659	0.377961	0.597993
C1QTNF2	54.7301	0.113901	0.129783	0.877625	0.380147	0.599862
CASP12	14.182	-0.108485	0.123612	-0.877626	0.380147	0.599862
F10	126.962	0.0945535	0.107644	0.878388	0.379733	0.599862
C1QL3	30.7534	-0.130015	0.148948	-0.872889	0.382724	0.602336
KLK11	10.7519	-0.131574	0.150665	-0.873289	0.382505	0.602336
TPP1	2725.29	-0.0355446	0.0407067	-0.873187	0.382561	0.602336
FKBP14	236.454	0.0506108	0.0581708	0.870037	0.38428	0.603724
TPSAB1	114.644	0.12103	0.139064	0.870317	0.384127	0.603724
ABO	146.212	-0.0792518	0.0913912	-0.867171	0.385848	0.605657
MELTF	67.0259	0.0720997	0.0833003	0.865539	0.386743	0.60653
RSPO3	1263.75	0.120266	0.139273	0.86353	0.387846	0.607728
MUC3A	651.329	0.089196	0.103523	0.861607	0.388904	0.608852
PANX1	1346.82	0.123839	0.143937	0.860373	0.389584	0.609246
VPREB3	18.4364	0.110796	0.128845	0.859915	0.389836	0.609246
LRRC8B	685.317	0.0824621	0.0963227	0.856102	0.391941	0.611469
LYPD3	25.7985	0.142036	0.165863	0.856345	0.391807	0.611469
PINLYP	21.9094	0.0717175	0.08384	0.855409	0.392325	0.611535
SFPQ	10702.7	-0.050316	0.058882	-0.854523	0.392815	0.611767
FAR1	2020.09	-0.0316252	0.0371817	-0.850558	0.395015	0.614658
NDFIP1	3417.33	0.0294003	0.0348228	0.844282	0.398512	0.618487
PKD1L1	114.344	0.0772454	0.091405	0.845089	0.398061	0.618487
TPSB2	116.012	0.121014	0.14326	0.844716	0.398269	0.618487
GDPD5	739.581	-0.0576657	0.0688317	-0.837778	0.402155	0.623602
ACHE	3849.6	0.120118	0.14393	0.834559	0.403966	0.625396
CBLN4	13.6892	-0.222908	0.267122	-0.83448	0.404011	0.625396
C1QTNF4	31.7553	0.0894335	0.107463	0.832228	0.40528	0.62682
MUC21	20.7218	0.17566	0.212235	0.827668	0.407858	0.630262
CRIM1	7911.42	-0.0814139	0.0988629	-0.823503	0.410222	0.631774
FGB	25.4315	-0.311298	0.378218	-0.823067	0.41047	0.631774
NENF	2294.64	0.0401946	0.0488546	0.822739	0.410656	0.631774
TNFRSF10B	1445.89	0.0717091	0.0872141	0.822218	0.410953	0.631774
VSIG2	43.1552	0.0661082	0.0801638	0.824664	0.409562	0.631774
WASL	2785.47	-0.0372462	0.0452858	-0.82247	0.410809	0.631774
SPACA6	42.3472	-0.0630366	0.0771083	-0.817508	0.413638	0.635357
PRSS2	134.893	0.342204	0.419164	0.816397	0.414273	0.635786
CD55	6789.05	-0.118045	0.144771	-0.815386	0.414852	0.63613
MFSD2A	33.8622	-0.147057	0.180926	-0.812806	0.416329	0.637304
PCSK1N	20.2217	-0.140403	0.172713	-0.812927	0.41626	0.637304
FKBP7	176.284	0.0463363	0.057099	0.811508	0.417074	0.637409
MFSD5	780.444	-0.0576916	0.0710973	-0.811446	0.41711	0.637409
C11orf24	628.805	0.046933	0.057913	0.810405	0.417707	0.637778
ADAMTS8	67.5977	0.157756	0.195392	0.807381	0.419447	0.638258
MAMDC4	441.034	0.0829151	0.10268	0.807513	0.419371	0.638258
TFRC	4756.83	0.135113	0.167128	0.808439	0.418838	0.638258
TMCO1	1320.64	-0.0337375	0.0417151	-0.80876	0.418653	0.638258
YIF1B	893.389	0.043269	0.053759	0.804871	0.420894	0.639917
FGF21	17.7748	-0.221707	0.275926	-0.803501	0.421685	0.640576
DNHD1	799.165	-0.0519131	0.0648215	-0.800862	0.423211	0.642349
PTX3	137.907	0.192455	0.240606	0.799876	0.423783	0.642671
MAT2B	2256.31	-0.0321101	0.0402527	-0.797713	0.425037	0.644028
NECTIN1	134.696	-0.0574381	0.0725108	-0.792131	0.428284	0.6484
ST6GAL1	1181.05	0.0702642	0.0887955	0.791303	0.428767	0.648582
A2M	11279.7	0.0448832	0.0568074	0.790095	0.429472	0.649101
ADAMTSL1	37.8	0.104027	0.131883	0.788782	0.43024	0.649197
WFS1	1477.76	0.0332762	0.0421888	0.788746	0.430261	0.649197
C6orf89	5105.92	-0.0370584	0.0470724	-0.787264	0.431127	0.649411
ECM1	430.466	0.0509341	0.0646485	0.787861	0.430778	0.649411
LRRC4C	22.8667	0.082861	0.105335	0.786639	0.431493	0.649416
POMGNT1	5123.63	-0.0464766	0.0592217	-0.784791	0.432576	0.650499
CTRB1	29.5421	0.226816	0.289777	0.782728	0.433787	0.651446
NAXE	1812.34	-0.0363039	0.046396	-0.782478	0.433934	0.651446
LEFTY1	17.5728	-0.090137	0.115295	-0.781797	0.434334	0.6515
CD320	955.379	0.0514345	0.0660127	0.77916	0.435885	0.653281
GRAMD1B	384.839	-0.102929	0.132287	-0.778071	0.436527	0.653695
FGA	35.6758	-0.305208	0.393283	-0.776053	0.437718	0.654931
LEFTY2	25.8235	-0.183948	0.239308	-0.768664	0.442093	0.659274
PPIA	5527.01	-0.0737489	0.0958173	-0.769682	0.441488	0.659274
PRSS27	15.9012	0.0768589	0.09992	0.769204	0.441772	0.659274
SLC17A5	472.658	0.0459097	0.0596986	0.769025	0.441878	0.659274
AOAH	21.1455	0.0771389	0.101067	0.763247	0.445316	0.663529
C1orf159	200.863	0.0370446	0.0486955	0.760739	0.446813	0.665205
CTSS	216.849	0.0620273	0.0816513	0.75966	0.447458	0.665612
GFER	550.032	-0.0384436	0.0506983	-0.758283	0.448282	0.66594
IL18R1	88.6071	-0.0964215	0.127197	-0.758048	0.448422	0.66594
ANXA2P2	41.8781	0.0906811	0.120282	0.753905	0.450906	0.668508
CALR	4807.6	-0.0401296	0.0532151	-0.754102	0.450788	0.668508
ITGA7	18563.3	0.0552787	0.0734058	0.753056	0.451416	0.668508
SCGB1D2	61.3407	0.148322	0.19714	0.75237	0.451828	0.668508
TEK	571.964	0.0441234	0.0586864	0.75185	0.452141	0.668508
TSLP	61.9693	0.0648527	0.0863051	0.751435	0.452391	0.668508
MXRA8	1551.57	0.0556889	0.0742641	0.749877	0.453329	0.669342
TGFB1	538.298	0.0482333	0.0646207	0.746406	0.455422	0.671879
CD276	554.253	0.0433723	0.0582588	0.744477	0.456588	0.672491
CDH23	208.561	-0.0650388	0.087355	-0.744534	0.456553	0.672491
MAPK14	2837.64	0.0275092	0.0370326	0.742837	0.457581	0.673399
CD200R1	11.2769	-0.0888708	0.119772	-0.742	0.458087	0.673591
TXNDC5	1940.99	-0.0411077	0.0555394	-0.740153	0.459207	0.674684
ADAMTS17	755.667	0.134189	0.182031	0.737176	0.461015	0.676529
CHPF2	690.105	-0.0640591	0.0871129	-0.735357	0.462122	0.676529
HRCT1	114.013	-0.0889303	0.120911	-0.735505	0.462032	0.676529
TAFA2	14.4962	-0.0871663	0.118397	-0.736221	0.461596	0.676529
VAPB	6544.69	0.0367367	0.0499833	0.73498	0.462352	0.676529
FCHSD1	164.907	-0.0430296	0.0588637	-0.731003	0.464777	0.679018
TINAG	11.9499	0.085509	0.116984	0.730948	0.464811	0.679018
ALKAL2	23.5947	0.135946	0.187521	0.724964	0.468474	0.683812
FXYD5	528.495	0.0467596	0.0647979	0.721622	0.470527	0.68383
LY6G5B	987.15	-0.0523137	0.0725356	-0.721215	0.470778	0.68383
NLGN4X	27.999	-0.0880221	0.121912	-0.722012	0.470287	0.68383
PIGT	4135.8	-0.0482718	0.0668582	-0.722004	0.470292	0.68383
SERINC1	11983.5	0.033624	0.0464865	0.723308	0.469491	0.68383
SSPOP	30.5573	0.0770037	0.106702	0.721671	0.470497	0.68383
ADM	2431.62	0.0891391	0.123817	0.719925	0.471571	0.684428
TMEM161B	539.09	-0.0398206	0.0554254	-0.718454	0.472478	0.685188
PRSS3	7.45004	0.182741	0.255336	0.715689	0.474184	0.687106
GALNT1	2861.52	-0.046455	0.06497	-0.715023	0.474595	0.687146
CFP	33.0409	-0.0711459	0.0996956	-0.713631	0.475456	0.687836
IGFBP4	5177.69	0.0656861	0.0921403	0.712892	0.475912	0.687941
ADAMTS10	390.531	0.0413799	0.0581119	0.712073	0.476419	0.687958
HRC	23310.3	0.0397551	0.0558647	0.711633	0.476692	0.687958
IGHM	60.1008	-0.13784	0.194251	-0.709597	0.477954	0.689223
MAGT1	1720.17	-0.0339352	0.0478705	-0.708895	0.47839	0.689297
ADAMTS14	19.5383	0.123384	0.175014	0.704995	0.480813	0.691536
SNED1	3061.57	-0.0814499	0.115549	-0.704894	0.480876	0.691536
SPINT1	20.1657	0.0864922	0.122766	0.704531	0.481102	0.691536
ENHO	12.957	0.082979	0.117919	0.703696	0.481622	0.691728
NPPA	131.51	0.121519	0.173252	0.701402	0.483052	0.693226
BMP6	230.14	0.0608129	0.087244	0.697044	0.485775	0.6946
F8	1914.79	0.0416365	0.0596368	0.698168	0.485072	0.6946
FKBP11	97.4321	0.05316	0.0763486	0.69628	0.486253	0.6946
MRPL55	1056.22	0.0310119	0.0443561	0.699157	0.484454	0.6946
RNPEP	991.681	-0.0263194	0.0377317	-0.697542	0.485464	0.6946
TMEM59	6634.36	-0.0246144	0.0353579	-0.696148	0.486336	0.6946
LRRC70	12.8831	0.0770232	0.110908	0.694478	0.487382	0.695539
MDK	152.075	0.0694734	0.100128	0.693844	0.48778	0.695552
ADAMTS2	335.923	0.0656388	0.0953086	0.688698	0.491013	0.696468
AGER	106.575	0.0425096	0.0615065	0.69114	0.489478	0.696468
AMY2B	2199.27	0.0447108	0.0649018	0.6889	0.490886	0.696468
CHRD	567.765	-0.0409666	0.059502	-0.68849	0.491144	0.696468
DPP7	2735.2	0.0286294	0.0415261	0.689432	0.490551	0.696468
HLA-C	7614.08	0.0470401	0.0680753	0.691002	0.489564	0.696468
NPFF	33.663	-0.0530169	0.0767348	-0.690911	0.489622	0.696468
ENPP3	11.0602	0.0939805	0.136762	0.687184	0.491967	0.696532
S100A9	776.768	0.111286	0.1619	0.687373	0.491848	0.696532
ACP6	454.255	-0.0497086	0.0724054	-0.686532	0.492378	0.696563
BMP7	14.0585	0.126354	0.185029	0.682888	0.494678	0.698162
LGALS1	11223.2	0.0503427	0.0736454	0.683582	0.494239	0.698162
TCTN1	508.585	-0.0620682	0.090876	-0.682999	0.494608	0.698162
P3H1	442.268	-0.0278042	0.0408071	-0.681357	0.495646	0.698514
WNT5B	58.1855	-0.058777	0.0862769	-0.68126	0.495707	0.698514
ERFE	803.201	-0.133202	0.196101	-0.679253	0.496978	0.69873
MTRNR2L12	165.901	0.075654	0.111392	0.679169	0.497031	0.69873
XYLT2	515.536	-0.0322389	0.0473836	-0.68038	0.496264	0.69873
SLC25A27	763.168	-0.0446587	0.0659863	-0.676787	0.498541	0.700303
COL8A2	64.1562	-0.0990105	0.146836	-0.674293	0.500125	0.700515
DPT	1509.35	0.0873936	0.129884	0.672857	0.501038	0.700515
IL6R	14015.2	-0.113795	0.169075	-0.673049	0.500916	0.700515
KAZALD1	323.27	0.109537	0.162438	0.674331	0.500101	0.700515
MFSD4A	47.1315	0.0685017	0.101608	0.674173	0.500202	0.700515
SERPINI1	104.411	0.0698025	0.103729	0.672934	0.500989	0.700515
GASK1B	450.326	0.0587353	0.0875326	0.671011	0.502214	0.700568
PPIB	618.458	0.0439614	0.0655208	0.670954	0.50225	0.700568
SPINK5	48.5382	0.0976203	0.145468	0.671077	0.502171	0.700568
ALG2	789.244	0.0517652	0.0772306	0.670267	0.502687	0.700633
TSPAN12	106.204	0.042705	0.063892	0.668393	0.503883	0.701753
B3GALNT1	54.4336	0.0485173	0.0727189	0.66719	0.504651	0.702277
MUC7	57.351	0.325738	0.490257	0.664423	0.50642	0.704191
LGI2	31.1763	0.0789947	0.119217	0.662613	0.507578	0.705254
CD63	17388.6	-0.0494047	0.0748233	-0.660285	0.509071	0.70678
NLRP3	54.6606	0.0766606	0.116442	0.658357	0.510309	0.707949
CRELD2	619.661	-0.0347867	0.053015	-0.656168	0.511716	0.709274
NELL2	13.1912	-0.0825447	0.125899	-0.655641	0.512055	0.709274
ANGPTL1	1335.42	-0.0492536	0.0753987	-0.653243	0.5136	0.710863
STEAP2	150.511	0.0948993	0.145419	0.652591	0.51402	0.710896
NRM	135.587	-0.0311722	0.0478912	-0.650897	0.515113	0.711858
SERPINF1	15351	-0.0402027	0.0618545	-0.649955	0.515721	0.712148
PLAT	582.48	-0.0569728	0.0882209	-0.645796	0.518411	0.715312
TMX4	4627.55	-0.041342	0.0641	-0.644961	0.518953	0.715508
IGLC3	18.6932	0.142982	0.222139	0.643661	0.519795	0.716118
FFAR2	9.07613	-0.111179	0.173033	-0.642529	0.52053	0.716579
ABHD18	855.008	0.0441708	0.0689426	0.64069	0.521724	0.716687
CD8B	7.50932	-0.102528	0.159841	-0.64144	0.521237	0.716687
COL6A6	42.5926	-0.115293	0.179989	-0.64056	0.521809	0.716687
CHID1	1179.6	-0.0243619	0.0381031	-0.639368	0.522583	0.717201
ECEL1	71.1166	-0.122467	0.194725	-0.628924	0.529399	0.723305
GATD1	1341.43	-0.0256693	0.040744	-0.630014	0.528686	0.723305
GHRL	12.3421	0.0767686	0.12208	0.628839	0.529454	0.723305
IZUMO4	110.619	-0.0657607	0.104327	-0.630332	0.528477	0.723305
METTL7B	219.078	0.105601	0.167587	0.63013	0.528609	0.723305
PIBF1	526.556	-0.0316522	0.0502095	-0.630402	0.528431	0.723305
UCN	115.701	-0.0498797	0.0797103	-0.625762	0.531471	0.72534
WNT4	113.536	0.0974247	0.155797	0.625331	0.531754	0.72534
FST	383.904	-0.0911227	0.146757	-0.62091	0.534659	0.728747
LIPG	293.288	-0.156914	0.253005	-0.620201	0.535126	0.728829
CFI	230.009	0.0392516	0.0636317	0.616856	0.53733	0.729872
CNTN4	59.648	-0.0639735	0.103857	-0.615978	0.537909	0.729872
GFRA3	13.146	0.111566	0.180598	0.617758	0.536735	0.729872
LIPF	54.5024	0.185416	0.299907	0.618244	0.536414	0.729872
PDGFRL	490.902	-0.0493362	0.0800981	-0.615948	0.537929	0.729872
LGI4	2984.86	-0.0600189	0.0976567	-0.61459	0.538825	0.729982
TXN	1481.02	0.0393009	0.0639285	0.614764	0.538711	0.729982
APOD	27765.6	-0.0671974	0.109792	-0.61204	0.540511	0.730057
APOOL	1800.58	0.0399121	0.0651654	0.612475	0.540224	0.730057
CST6	14.1418	0.100149	0.163427	0.612806	0.540004	0.730057
SFRP5	59.8823	-0.163554	0.266772	-0.613087	0.539819	0.730057
CDHR5	21.2685	-0.0809695	0.133662	-0.605776	0.544664	0.735111
CLEC4G	13.078	0.112721	0.187644	0.600715	0.54803	0.739098
SH2D3C	734.862	0.0298253	0.0498533	0.598262	0.549665	0.740745
CLASRP	2613.74	-0.0320538	0.0538193	-0.595582	0.551454	0.742598
COCH	34.168	0.0518591	0.0875002	0.592674	0.553399	0.744307
IL20RB	51.5924	0.0429305	0.0724637	0.592441	0.553555	0.744307
GLB1L	61.8269	0.0462011	0.078352	0.589661	0.555418	0.746251
BMP5	297.277	0.041008	0.069738	0.588029	0.556513	0.746602
SDCBP	3337.78	-0.0216808	0.0368543	-0.588284	0.556342	0.746602
VWF	10358.5	0.0463259	0.0790084	0.586341	0.557646	0.747563
C2orf69	867.948	0.0380844	0.0650557	0.585412	0.558271	0.74784
B3GAT1	13.3979	0.0767746	0.131872	0.58219	0.560438	0.750072
MGP	2153.64	0.0486512	0.0836373	0.581692	0.560774	0.750072
CST3	13521.9	-0.0467456	0.0804516	-0.58104	0.561214	0.7501
THSD1	306.025	0.0311162	0.0536622	0.579853	0.562013	0.750609
ENPP1	343.143	0.0401422	0.0693884	0.578514	0.562917	0.751255
BMP8A	23.0073	0.0577449	0.100296	0.575744	0.564788	0.753191
ADGRL4	1030.19	0.0395212	0.0688711	0.573844	0.566073	0.754343
GDF7	15.1882	0.0848408	0.148562	0.571081	0.567945	0.755891
TTC14	1131.74	-0.0305764	0.0535598	-0.570883	0.568079	0.755891
SFN	49.9129	-0.0904514	0.159166	-0.568284	0.569842	0.757112
TMUB1	2155.02	-0.0362956	0.0638457	-0.568489	0.569703	0.757112
BSDC1	3244.19	0.0276539	0.0487802	0.566907	0.570777	0.757793
PGC	86.7399	0.16557	0.292931	0.565219	0.571925	0.758754
MTRNR2L1	14.7593	0.0984266	0.174354	0.564522	0.572399	0.75882
CPA1	118.769	0.144208	0.256176	0.562927	0.573485	0.759698
ERLIN2	1463.34	0.0292398	0.0521461	0.560728	0.574983	0.759996
MUC20	342.551	-0.0554686	0.0987474	-0.561722	0.574305	0.759996
WNT11	396.889	0.0585419	0.104343	0.561053	0.574762	0.759996
CKAP4	1076.53	-0.0233848	0.0418915	-0.558221	0.576693	0.761428
NTNG2	60.1825	0.0829775	0.148733	0.557894	0.576917	0.761428
BCAN	22.1104	0.0587825	0.105881	0.555176	0.578774	0.761814
CYP4Z1	32.8677	0.0664218	0.119586	0.555431	0.5786	0.761814
ERP29	1172.09	0.0210132	0.0378632	0.554977	0.57891	0.761814
FGFRL1	1745.76	-0.0448742	0.0806007	-0.556746	0.577701	0.761814
RDH14	1156.42	0.0244196	0.0441972	0.552514	0.580597	0.763472
SLC27A3	310.325	0.0327335	0.059471	0.550411	0.582037	0.764805
PAPLN	215.093	0.0520079	0.0948927	0.54807	0.583644	0.766353
MANSC1	207.791	0.0274375	0.050189	0.546684	0.584596	0.766356
MGAT4B	2259.83	0.0350326	0.0641389	0.546199	0.584929	0.766356
NXPH4	8.61034	0.080393	0.147083	0.546584	0.584665	0.766356
FBLN5	1831.88	-0.0398473	0.0736814	-0.540804	0.588642	0.769175
ICE2	1135.39	0.0276703	0.0512455	0.539955	0.589228	0.769175
MEGF6	630.234	-0.0426832	0.0788968	-0.541	0.588508	0.769175
POMC	154.137	0.091301	0.168351	0.542325	0.587595	0.769175
SBSPON	55.7776	-0.0645491	0.119437	-0.540443	0.588892	0.769175
CLDN18	7.63395	-0.0826498	0.154666	-0.534376	0.593081	0.773641
OSCAR	19.1501	-0.0558929	0.104766	-0.533501	0.593687	0.773867
FCRLA	8.68379	0.15311	0.287547	0.532469	0.594401	0.774235
FSTL3	546.563	-0.0411439	0.0776688	-0.529735	0.596295	0.776137
ZDHHC16	1047.22	0.0312154	0.0593368	0.526071	0.598839	0.778882
ADAMTSL5	732.869	0.0625753	0.119503	0.523628	0.600538	0.780278
TMEM178A	110.1	0.055668	0.106384	0.523274	0.600783	0.780278
APOE	499.65	0.0488283	0.0937798	0.520669	0.602597	0.781115
GPLD1	84.3627	0.0605464	0.116118	0.521421	0.602073	0.781115
HMGB2	1920.26	-0.0564036	0.108371	-0.52047	0.602736	0.781115
CFB	185.476	0.0519098	0.100072	0.518725	0.603953	0.782125
MAN1B1	1233.17	0.0252861	0.0488798	0.517313	0.604938	0.782835
BCHE	62.1518	0.0706665	0.137889	0.512489	0.608309	0.784929
CRTAC1	58.4046	0.0753388	0.146709	0.513524	0.607585	0.784929
EFEMP1	869.121	0.0587365	0.114295	0.513904	0.607319	0.784929
RMND5B	2764.24	-0.0249308	0.0486146	-0.512825	0.608074	0.784929
ACE2	71.8561	0.11125	0.217563	0.511347	0.609108	0.785195
SSC4D	35.4842	0.046412	0.0908362	0.510941	0.609392	0.785195
CPXM2	318.783	0.0613815	0.120404	0.509796	0.610195	0.785391
PGAP1	357.302	0.0249057	0.0488853	0.509472	0.610421	0.785391
DHRS7	15281	-0.0580207	0.114166	-0.508215	0.611302	0.78568
SLC44A3	8.24807	0.0718086	0.141383	0.507901	0.611523	0.78568
KL	90.2824	0.0405283	0.080251	0.505019	0.613545	0.787149
LCN2	16.8027	0.0986597	0.195284	0.505212	0.61341	0.787149
CST7	31.8797	0.0571758	0.113607	0.503277	0.61477	0.788155
FLRT3	136.708	0.0746584	0.149112	0.500686	0.616592	0.789926
THBS4	6805.46	0.0769343	0.154214	0.49888	0.617864	0.79099
CHST9	9.80936	0.121031	0.244764	0.494483	0.620965	0.792129
EGFR	2530.9	-0.0405627	0.0819798	-0.494789	0.620749	0.792129
LMAN2L	1051.69	0.0352675	0.0710209	0.49658	0.619486	0.792129
PCDH12	323.548	0.0407492	0.0821222	0.496202	0.619752	0.792129
SEMA4A	257.875	0.0415866	0.0840994	0.494494	0.620957	0.792129
FXYD4	22.137	0.100078	0.202852	0.493355	0.621762	0.792525
TLR9	182.911	-0.0670429	0.136048	-0.49279	0.622161	0.792525
FLRT2	1366.5	0.071185	0.14468	0.492018	0.622707	0.792656
CELA2A	14.0471	0.171493	0.349964	0.490031	0.624112	0.793881
ITGB3	141.315	0.0531628	0.108877	0.488281	0.625351	0.794868
TREM1	19.756	0.0721469	0.147939	0.487681	0.625776	0.794868
ZDHHC9	1175.45	0.0427437	0.0879945	0.485755	0.627141	0.796038
COLEC11	14.966	0.0671636	0.139665	0.480891	0.630594	0.799348
SFRP1	268.696	0.0650533	0.135295	0.480824	0.630641	0.799348
C17orf58	139.36	0.0263359	0.0551739	0.477326	0.63313	0.800099
DNAJB9	2359.33	-0.040302	0.0844944	-0.476979	0.633377	0.800099
PLXDC2	1120.16	0.0340006	0.0711626	0.477787	0.632802	0.800099
SCN1B	22671.1	-0.0314458	0.0658228	-0.477734	0.632839	0.800099
TMED2	4751.62	-0.0255273	0.0535329	-0.476852	0.633467	0.800099
EGFL8	271.536	-0.0225661	0.0479617	-0.470503	0.637996	0.804684
LRRN2	130.019	-0.0346361	0.0735385	-0.470993	0.637646	0.804684
TIMP2	3796.8	-0.0349098	0.07434	-0.469597	0.638643	0.804933
CALU	4886.29	-0.0304013	0.0655115	-0.464061	0.642604	0.808787
TF	37.8332	-0.0529685	0.114132	-0.464097	0.642578	0.808787
IL34	344.182	-0.077409	0.167311	-0.462665	0.643605	0.809083
SHC4	39.9515	0.0729717	0.157786	0.462472	0.643743	0.809083
FAP	132.761	-0.0580995	0.126253	-0.460183	0.645385	0.809734
MET	1624.74	0.0367949	0.0800133	0.45986	0.645617	0.809734
SLPI	6267.46	-0.119701	0.260143	-0.460133	0.64542	0.809734
COL9A3	51.2329	0.0562148	0.122612	0.458476	0.64661	0.809845
ZDHHC15	32.1743	-0.0335336	0.0731402	-0.458484	0.646605	0.809845
FGFBP3	79.6702	-0.0408744	0.0900477	-0.453919	0.649887	0.812814
LYZ	110.277	0.0631832	0.139195	0.453918	0.649888	0.812814
GZMA	11.1022	0.0679505	0.150748	0.450757	0.652165	0.815092
C3	4980.44	-0.0455239	0.101306	-0.449372	0.653163	0.815298
IGHG2	57.0234	-0.09717	0.216287	-0.449264	0.653241	0.815298
TUB	367.677	-0.0273832	0.0610367	-0.448635	0.653695	0.815298
METTL7A	3709.31	-0.0394002	0.0882309	-0.446558	0.655194	0.816031
MMP28	135.177	0.0416752	0.0932077	0.447122	0.654787	0.816031
DEAF1	1142.25	0.0248818	0.056169	0.442981	0.65778	0.818076
ITLN1	13.5975	-0.103057	0.232954	-0.442391	0.658206	0.818076
NHLRC3	609.822	0.0224634	0.0507607	0.442535	0.658102	0.818076
LY6K	50.1792	0.0541898	0.123208	0.439824	0.660065	0.819249
NRROS	71.9962	0.0344193	0.0782405	0.439917	0.659997	0.819249
TMEM230	3596.26	-0.0189972	0.0432826	-0.438912	0.660726	0.819501
CRB1	46.9023	0.0563337	0.128766	0.437489	0.661757	0.820212
INHBA	60.4215	-0.0586299	0.134746	-0.435114	0.663479	0.821779
CDC45	11.5493	-0.0461678	0.107103	-0.431062	0.666423	0.823313
CHODL	31.8096	0.0850014	0.196979	0.431524	0.666087	0.823313
FAM174A	1304.56	0.0223711	0.0521492	0.428983	0.667936	0.823313
IL17RD	92.5011	0.0522782	0.121505	0.430256	0.667009	0.823313
LMBR1L	1095.99	-0.0239229	0.0555917	-0.430333	0.666953	0.823313
PRL	119.009	0.157707	0.367364	0.429294	0.667709	0.823313
SVBP	287.972	0.0236763	0.0551581	0.429244	0.667746	0.823313
B4GALT7	779.97	0.0197063	0.0462098	0.426453	0.669778	0.823476
IDE	4407.59	-0.0277162	0.0648363	-0.427479	0.66903	0.823476
PCSK6	682.151	0.0448987	0.105328	0.426275	0.669908	0.823476
THSD7A	72.6826	0.0403532	0.0944446	0.427269	0.669183	0.823476
SLC25A14	181.791	-0.0287993	0.0678689	-0.424338	0.671319	0.824645
CTSB	15563.8	-0.0355059	0.0838113	-0.423641	0.671828	0.824704
FAM24B	7.87955	0.0451486	0.10751	0.419949	0.674522	0.826841
HEPH	80.8484	0.0431754	0.102893	0.419616	0.674766	0.826841
TLL1	58.1627	0.0469327	0.111915	0.41936	0.674953	0.826841
CRYAB	124908	0.0331219	0.0801288	0.413358	0.679345	0.831083
GGH	92.2787	-0.0351776	0.0851014	-0.413361	0.679342	0.831083
S100A12	29.2043	-0.0833265	0.203402	-0.409664	0.682053	0.83269
STC2	530.635	-0.0619024	0.150925	-0.410154	0.681693	0.83269
TMEM231	144.865	0.0222509	0.054219	0.410389	0.681521	0.83269
SCARA5	1495.41	0.0372732	0.0912015	0.408691	0.682767	0.832994
MUC4	34.0064	0.049418	0.121378	0.407143	0.683903	0.833812
CCL16	7.51029	0.0746888	0.185851	0.401874	0.687777	0.836826
DPEP2	52.7911	0.0326233	0.0811311	0.402106	0.687606	0.836826
ECM2	341.869	-0.0464915	0.115442	-0.402726	0.68715	0.836826
CHRDL1	471.672	-0.051111	0.127763	-0.400045	0.689123	0.837895
SLURP2	7.25717	0.0673406	0.169909	0.396334	0.691859	0.840651
IGKC	214.575	0.0672092	0.171826	0.391148	0.695688	0.84473
BMP2	204.585	0.0331622	0.0853901	0.388361	0.697749	0.84543
CDH16	38.9893	-0.104716	0.270314	-0.387385	0.698471	0.84543
NPIPB15	114.178	-0.0949163	0.244446	-0.388291	0.697801	0.84543
TMEM52	4689.33	0.045277	0.116941	0.387178	0.698624	0.84543
ZDHHC11	216.299	-0.0395093	0.102039	-0.387197	0.69861	0.84543
SULF2	1084.28	0.0256682	0.0666884	0.384897	0.700313	0.846902
IGF2	5804.38	-0.0447122	0.119165	-0.375213	0.707502	0.854085
LRRN1	526.553	0.0513436	0.136861	0.375151	0.707548	0.854085
ST6GALNAC3	185.785	-0.0392292	0.10462	-0.374968	0.707684	0.854085
TMEM130	12.104	-0.0600201	0.161194	-0.372347	0.709634	0.855862
NRP2	351.287	0.0305724	0.0825511	0.370345	0.711125	0.857083
COL4A1	6643.92	-0.0286643	0.0780313	-0.367343	0.713363	0.858625
NPTX2	592.771	-0.0564767	0.153631	-0.367613	0.713161	0.858625
ANGPT2	365.589	0.0467776	0.128398	0.364316	0.715622	0.85961
POGLUT3	431.502	-0.0246697	0.0676552	-0.364638	0.715382	0.85961
TNFRSF11B	29.5984	-0.0600536	0.164634	-0.364771	0.715282	0.85961
COL5A3	1990.29	0.0254797	0.0701392	0.363274	0.7164	0.859968
GSDMD	567.495	0.0215319	0.0594501	0.362185	0.717214	0.860368
VEGFC	157.989	-0.0347707	0.0963433	-0.360904	0.718171	0.86094
LAMA5	4204.17	-0.0219575	0.0611772	-0.358916	0.719658	0.861569
ORM1	26.1287	-0.0916095	0.254794	-0.359543	0.719189	0.861569
CRELD1	2341.05	0.0192878	0.0542831	0.355318	0.722351	0.863799
GPR89A	141.588	-0.018735	0.052754	-0.355139	0.722485	0.863799
DBH	7.44877	0.0546679	0.154494	0.353852	0.72345	0.863799
PTOV1	2708.15	0.0165516	0.046758	0.353985	0.72335	0.863799
FAM151B	20.2091	-0.0341328	0.0974453	-0.350276	0.726131	0.866296
VTN	22.9982	0.0514047	0.146965	0.349774	0.726508	0.866296
ADAMTSL3	265.035	0.0302874	0.0872226	0.347243	0.728409	0.866831
GARS1	3300.38	-0.0184667	0.0530601	-0.348034	0.727815	0.866831
TINAGL1	3185.43	-0.0172128	0.0495138	-0.347637	0.728112	0.866831
HNRNPA2B1	40516.2	0.0137156	0.0397105	0.34539	0.729801	0.867767
VWA3A	7.53919	0.0417003	0.120903	0.344907	0.730165	0.867767
COL18A1	2438.04	0.0252559	0.0736914	0.342725	0.731805	0.868362
CWC27	1020.55	0.0166584	0.0486651	0.342307	0.73212	0.868362
GAS6	6237.87	0.0204078	0.0594092	0.343512	0.731213	0.868362
ABI3BP	664.228	-0.0412723	0.122722	-0.336307	0.736639	0.8686
CLEC7A	72.5081	-0.033093	0.0976618	-0.338853	0.73472	0.8686
COL5A2	881.476	-0.0311108	0.0921184	-0.337726	0.73557	0.8686
GNPTG	1272.71	0.0128932	0.0379159	0.340046	0.733822	0.8686
LPAL2	29.0836	0.0489342	0.144686	0.338209	0.735205	0.8686
MAPT	11852.6	0.0214424	0.0637699	0.336246	0.736685	0.8686
MFAP5	1270.59	-0.0431672	0.128288	-0.336488	0.736503	0.8686
NAPSA	9.5306	-0.0385276	0.11388	-0.338316	0.735125	0.8686
SELENOT	2325.88	0.0134565	0.0396021	0.339794	0.734012	0.8686
COL28A1	625.354	-0.0528433	0.159387	-0.33154	0.740237	0.872213
EMC7	2253.88	-0.0192494	0.0582173	-0.330647	0.740911	0.872434
CILP	1852.33	0.0440158	0.133935	0.328636	0.742431	0.872757
PET117	93.0904	0.019354	0.058919	0.328484	0.742545	0.872757
SLITRK2	10.2526	0.0496301	0.15115	0.328349	0.742648	0.872757
TNMD	76.2108	0.0868665	0.265749	0.326874	0.743763	0.873347
TSPAN6	272.954	0.0166167	0.0509098	0.326396	0.744125	0.873347
PPCDC	254.73	0.0235089	0.0723467	0.324948	0.745221	0.87406
FBLN2	3551.43	-0.0307182	0.0949094	-0.323659	0.746197	0.874632
ERAP1	2406.68	-0.0228068	0.0712211	-0.320225	0.748798	0.874818
HPR	26.2747	-0.0665018	0.20609	-0.322683	0.746935	0.874818
IL27RA	154.609	-0.0199924	0.0623237	-0.320784	0.748374	0.874818
LAG3	15.2432	0.0395494	0.12327	0.320834	0.748336	0.874818
MMP16	25.7948	-0.0410352	0.127783	-0.321132	0.74811	0.874818
BTNL9	2931.39	-0.0204265	0.0642456	-0.317944	0.750528	0.875916
TNFSF13B	29.1435	0.0283013	0.089083	0.317696	0.750716	0.875916
IL17RC	1739.17	-0.0248934	0.0785404	-0.31695	0.751281	0.876006
FBLN1	2176.83	-0.0299724	0.094873	-0.315921	0.752063	0.876346
C1GALT1C1	293.594	0.0155672	0.0499652	0.31156	0.755375	0.879299
COL4A2	6835.27	0.0216067	0.0699903	0.30871	0.757543	0.879299
FBLN7	54.9772	0.0371636	0.119586	0.31077	0.755976	0.879299
INHA	34.1515	-0.039346	0.127316	-0.309041	0.75729	0.879299
MUC6	21.4789	0.0469412	0.151322	0.310208	0.756403	0.879299
SEMA3D	10.8842	-0.0568741	0.183615	-0.309747	0.756754	0.879299
ALCAM	86.6652	0.027875	0.0908592	0.306793	0.759001	0.879755
CDCP1	42.5273	0.0434614	0.142228	0.305574	0.759929	0.879755
DLL1	450.474	0.0340475	0.11102	0.306679	0.759087	0.879755
PLA2G15	2811.8	0.0305841	0.100195	0.305246	0.760179	0.879755
THNSL2	3757.39	0.0305237	0.100088	0.304967	0.760391	0.879755
SEMA3F	808.845	-0.0232207	0.0766056	-0.303121	0.761798	0.880581
TMEM9	1585.61	-0.0236583	0.0781474	-0.302739	0.762089	0.880581
FBXO8	381.972	-0.0117376	0.0389212	-0.301574	0.762977	0.880687
TIMP3	14623	0.0180906	0.060036	0.301328	0.763164	0.880687
DEFB1	17.4246	0.0704962	0.236301	0.298333	0.765449	0.88162
OVCH2	7.7061	-0.0355081	0.118924	-0.298577	0.765263	0.88162
SDC2	951.01	-0.0227568	0.0761306	-0.298918	0.765002	0.88162
WNT9A	2496.42	-0.0384022	0.131111	-0.292899	0.769599	0.885831
PNLIP	81.5019	0.122702	0.42023	0.291988	0.770295	0.886062
PODXL2	166.962	0.0245012	0.085309	0.287206	0.773955	0.889548
TMEM9B	1915	-0.0144533	0.0504072	-0.28673	0.774319	0.889548
SERPINB1	2285.83	0.0410262	0.144863	0.283206	0.777019	0.892077
COL21A1	276.304	-0.0472401	0.168647	-0.280113	0.779391	0.893655
KTN1	24915.5	0.0180401	0.0643622	0.28029	0.779255	0.893655
LACTB	2262.89	0.018467	0.066361	0.278281	0.780796	0.894122
LAMC3	60.375	-0.0402415	0.144585	-0.278325	0.780763	0.894122
APP	6258.32	0.013113	0.047784	0.274423	0.78376	0.896369
HSD17B7	98.4203	-0.0199547	0.0726833	-0.274544	0.783667	0.896369
GRAMD1C	67.2518	-0.0404118	0.152292	-0.265357	0.790735	0.903192
PIGU	632.121	0.0132601	0.0499044	0.265711	0.790462	0.903192
CRP	22.8515	0.0803094	0.306645	0.261897	0.793401	0.905393
PXDNL	93.4107	-0.0467213	0.178636	-0.261545	0.793673	0.905393
IHH	7.31922	0.0515379	0.19792	0.260397	0.794558	0.905826
COL8A1	280.976	0.0238513	0.0918406	0.259703	0.795093	0.90586
SERPINB5	13.3205	0.0508987	0.196518	0.259003	0.795633	0.905899
COG7	673.188	-0.0120704	0.0474475	-0.254396	0.79919	0.908495
COL4A3	3512.66	-0.0324914	0.127878	-0.25408	0.799434	0.908495
MASP2	162.518	-0.0184416	0.0725825	-0.254078	0.799435	0.908495
PRSS1	113.483	0.0974908	0.385431	0.25294	0.800315	0.908918
SEC11C	380.863	0.0152891	0.060652	0.25208	0.800979	0.909096
TMX2	2165.18	-0.0147203	0.0586888	-0.25082	0.801953	0.909625
COL4A4	1280.66	-0.0282097	0.112853	-0.249969	0.802612	0.909796
SEMA4C	857.788	-0.0130965	0.0529536	-0.24732	0.80466	0.911541
HDGF	13036.7	0.0146089	0.0594366	0.245789	0.805846	0.911919
SLMAP	4972.75	0.0160972	0.0655491	0.245574	0.806012	0.911919
CDH2	40.5608	0.0371748	0.151824	0.244855	0.806569	0.911973
HSP90AB1	87840	0.012749	0.0526897	0.241964	0.808808	0.91293
PXYLP1	195.563	0.0203595	0.0841591	0.241917	0.808845	0.91293
TOM1	12113	-0.0207015	0.0856184	-0.241788	0.808945	0.91293
BOLA1	448.521	0.0141911	0.0589653	0.240668	0.809812	0.913334
GLT8D2	104.708	0.0226605	0.0974843	0.232453	0.816186	0.917057
IGKV4-1	7.2358	0.0597295	0.255111	0.234131	0.814883	0.917057
IL18	195.367	0.0330689	0.142174	0.232595	0.816076	0.917057
NOTCH2NLA	92.9841	-0.0270485	0.11599	-0.233197	0.815609	0.917057
RARRES2	254.577	-0.0240578	0.102824	-0.23397	0.815009	0.917057
TNFRSF10C	16.4773	-0.0270636	0.116289	-0.232727	0.815973	0.917057
ULBP2	10.3956	-0.0329107	0.142237	-0.23138	0.81702	0.917418
CPQ	432.433	0.0161595	0.070585	0.228936	0.818919	0.917824
FBN1	1913.52	-0.0212049	0.0925076	-0.229223	0.818695	0.917824
FGL2	406.844	-0.0221194	0.0960991	-0.230173	0.817958	0.917824
SCUBE3	57.2796	-0.0366691	0.160683	-0.228207	0.819485	0.917885
IFI30	180.878	0.024082	0.106763	0.225565	0.82154	0.919611
CSF3R	246.012	-0.0262107	0.116791	-0.224423	0.822428	0.919765
IMPG1	8.22487	-0.0256909	0.114657	-0.224068	0.822705	0.919765
PRXL2A	2565.6	-0.0130614	0.0589274	-0.221652	0.824585	0.921293
BCAP29	2622.11	0.0128604	0.0585142	0.219782	0.826041	0.922204
LILRA5	21.2923	0.0359109	0.163766	0.219282	0.826431	0.922204
ANTXR2	1268.84	-0.0172909	0.0823958	-0.209852	0.833783	0.924075
ATRN	2165.6	-0.00876843	0.0414693	-0.211444	0.832541	0.924075
C4A	45.2085	-0.0305318	0.144388	-0.211456	0.832532	0.924075
CD160	8.61709	-0.0267738	0.125822	-0.21279	0.831491	0.924075
COL27A1	870.921	0.014811	0.0701975	0.210991	0.832895	0.924075
FLT3LG	179.955	0.011365	0.0529254	0.214736	0.829974	0.924075
KDR	1004.32	0.0151722	0.0708174	0.214244	0.830357	0.924075
PERP	428.214	0.0214609	0.0997161	0.21522	0.829595	0.924075
SPCS3	2755.52	0.0105864	0.0503555	0.210233	0.833486	0.924075
TMEFF2	16.5116	-0.0385938	0.182741	-0.211194	0.832736	0.924075
WNT10B	16.5261	-0.0325071	0.150673	-0.215745	0.829186	0.924075
ADGRG1	1130.75	0.0120963	0.058101	0.208194	0.835078	0.924938
CES4A	661.165	-0.0436601	0.210914	-0.207004	0.836006	0.925394
HSD17B13	20.1014	0.0237587	0.116658	0.20366	0.838619	0.92714
ITIH6	263.774	-0.0210669	0.103425	-0.203691	0.838595	0.92714
APH1A	2701.3	-0.00946375	0.0466318	-0.202947	0.839177	0.927184
EPHA3	102.449	0.0235966	0.117621	0.200616	0.840999	0.928052
NODAL	85.2851	0.0318461	0.158438	0.201	0.840698	0.928052
NUDT9	1268.57	0.00997737	0.0502028	0.198741	0.842465	0.928859
PDIA6	1977.65	0.01017	0.0512715	0.198355	0.842767	0.928859
LCLAT1	318.851	-0.0144234	0.0740494	-0.194781	0.845564	0.931369
PAOX	189.949	0.01191	0.0619852	0.192143	0.84763	0.932307
PRTN3	8.22343	-0.0580406	0.302768	-0.1917	0.847978	0.932307
RDH10	529.171	-0.0120792	0.0629877	-0.19177	0.847922	0.932307
ITIH2	17.871	0.0190449	0.10037	0.189747	0.849507	0.933416
AGGF1	1264.67	0.00882706	0.049268	0.179164	0.857809	0.93975
ASGR1	9.89012	0.0223999	0.12515	0.178984	0.85795	0.93975
BCAR3	1644.96	-0.0144816	0.0821039	-0.176382	0.859994	0.93975
ERLEC1	1836.04	0.00737099	0.0416063	0.17716	0.859382	0.93975
FUOM	49.1784	-0.0141299	0.0792995	-0.178184	0.858578	0.93975
IFNLR1	314.386	-0.0172811	0.0959326	-0.180138	0.857044	0.93975
LEPROTL1	732.239	-0.00908657	0.0515042	-0.176424	0.859961	0.93975
PGA3	11.7724	-0.0775756	0.42832	-0.181116	0.856276	0.93975
SIGIRR	279.616	-0.00966018	0.0540821	-0.178621	0.858236	0.93975
CELF2-AS1	37.4347	0.021734	0.124611	0.174416	0.861539	0.940697
DNAJC10	1829.04	-0.00653249	0.0377938	-0.172846	0.862773	0.940697
EDA	143.813	-0.0110276	0.0638894	-0.172605	0.862962	0.940697
SCG5	9.63635	0.0274806	0.158871	0.172974	0.862672	0.940697
ITM2A	943.371	0.0119016	0.070006	0.170008	0.865004	0.942349
NXPH3	90.5677	-0.0146277	0.0872621	-0.167629	0.866875	0.942668
PTPRZ1	15.8806	-0.0242573	0.144067	-0.168375	0.866288	0.942668
RNLS	325.115	-0.0128628	0.0765813	-0.167963	0.866612	0.942668
PRSS12	10.5158	0.0281296	0.16888	0.166565	0.867712	0.943005
EGFL7	2112.66	0.00848935	0.0511859	0.165853	0.868272	0.943042
DSCC1	102.545	0.0115226	0.0700309	0.164536	0.86931	0.943596
EMILIN3	42.3101	-0.0287476	0.179264	-0.160364	0.872594	0.946579
EVA1C	519.09	-0.0107258	0.0671609	-0.159703	0.873115	0.946579
SEC13	3738.47	-0.00743973	0.0467817	-0.159031	0.873645	0.94658
ARSG	264.064	0.0133641	0.0848095	0.157578	0.874789	0.947248
FSTL1	3418.06	0.012606	0.0809509	0.155724	0.876251	0.948257
GINM1	1975.06	0.00575651	0.0373629	0.15407	0.877555	0.949094
KRTCAP2	1780.26	0.00823849	0.0541837	0.152047	0.87915	0.950246
DNAJB14	669.118	-0.00657701	0.0438594	-0.149957	0.880799	0.951317
JCHAIN	30.8427	0.0262097	0.175381	0.149444	0.881203	0.951317
PTCH2	209.783	-0.0115131	0.0793381	-0.145114	0.884621	0.954431
ARSK	173.877	-0.00975518	0.0678451	-0.143786	0.885669	0.954987
HP	78.7872	0.0303479	0.218583	0.138839	0.889577	0.958404
SDC1	36.374	0.0181634	0.131864	0.137743	0.890443	0.958404
SEMA3A	16.7796	0.0229443	0.165921	0.138285	0.890016	0.958404
CHST14	236.62	-0.00534534	0.0393612	-0.135802	0.891978	0.959479
IGKV3-20	14.4232	-0.0302041	0.228908	-0.131949	0.895025	0.962179
BTN3A3	215.676	0.00912961	0.069911	0.130589	0.8961	0.962757
ARSJ	39.3744	-0.0110708	0.0877913	-0.126103	0.89965	0.96415
ART5	301.626	0.0125161	0.10084	0.124118	0.901222	0.96415
EBI3	7.61788	-0.0183419	0.14527	-0.126261	0.899526	0.96415
FCGR3B	29.25	-0.0205362	0.164134	-0.125118	0.90043	0.96415
GLB1L2	85.5713	-0.0123588	0.0979495	-0.126175	0.899593	0.96415
MINPP1	285.826	0.00625276	0.0506256	0.12351	0.901703	0.96415
PPIL1	631.605	0.00931974	0.0751201	0.124064	0.901264	0.96415
SRGN	1116.8	0.00949285	0.0743129	0.127742	0.898354	0.96415
LILRA2	13.4332	0.015075	0.12365	0.121917	0.902965	0.964923
ST6GALNAC6	2943.26	0.00680966	0.0567236	0.12005	0.904444	0.965926
ITM2B	8338.38	0.0051253	0.0431337	0.118824	0.905415	0.966388
APOA1	15.0306	0.0197527	0.174787	0.11301	0.910023	0.966829
BGN	1685.68	0.0119617	0.108222	0.11053	0.911989	0.966829
C4orf48	8.35799	0.015022	0.134963	0.111304	0.911375	0.966829
COL17A1	33.0034	-0.0175543	0.160918	-0.109089	0.913132	0.966829
CPXM1	50.3166	-0.023433	0.219772	-0.106624	0.915087	0.966829
FSTL4	25.8422	0.0164009	0.154448	0.10619	0.915431	0.966829
IGLV5-52	73.0582	-0.00556785	0.0515147	-0.108083	0.91393	0.966829
IL15RA	391.289	0.00738139	0.0685945	0.107609	0.914306	0.966829
ITIH3	95.507	0.0148324	0.140771	0.105366	0.916086	0.966829
METRN	599.91	-0.00663174	0.0622706	-0.106499	0.915187	0.966829
MIF	11.1418	-0.0138353	0.12664	-0.109249	0.913005	0.966829
OLFM2	56.5386	0.0111567	0.105657	0.105594	0.915905	0.966829
PCDHB10	29.6164	-0.00960238	0.085396	-0.112445	0.91047	0.966829
PGA5	16.5927	-0.0285666	0.249506	-0.114493	0.908847	0.966829
SIGLEC10	12.9487	-0.0161804	0.143287	-0.112923	0.910091	0.966829
SPX	251.965	0.0206993	0.196046	0.105584	0.915912	0.966829
TNFRSF1A	4969.7	0.0105406	0.0903394	0.116678	0.907115	0.966829
TNFSF13	248.722	-0.00466218	0.0412831	-0.112932	0.910085	0.966829
ZDHHC24	447.911	-0.00646709	0.0608902	-0.106209	0.915417	0.966829
CD40	410.263	-0.0062284	0.059897	-0.103985	0.917181	0.967415
GPX8	107.94	-0.00845462	0.0866177	-0.0976085	0.922243	0.972182
ADAM33	1032.01	-0.00846813	0.0900365	-0.0940521	0.925068	0.972415
ADAMTS1	6633.05	0.0076435	0.0801856	0.0953226	0.924059	0.972415
CCDC134	87.5905	0.00687657	0.0765402	0.0898427	0.928412	0.972415
CCN2	2840.95	-0.012614	0.132966	-0.0948663	0.924421	0.972415
CD6	13.9349	0.0119609	0.130491	0.0916609	0.926967	0.972415
CSTA	25.9508	0.0119496	0.13215	0.0904246	0.92795	0.972415
EPHA7	24.1569	-0.0125041	0.138206	-0.0904744	0.92791	0.972415
IL1R1	1986.29	0.00834158	0.0908992	0.0917674	0.926883	0.972415
PON3	24.4389	0.0076435	0.0851056	0.089812	0.928437	0.972415
STAB1	2731.72	-0.00745346	0.0798848	-0.0933027	0.925663	0.972415
VWA2	10.2209	0.0170087	0.176203	0.0965288	0.923101	0.972415
COL9A2	21.8007	-0.0084702	0.101954	-0.083079	0.933789	0.975495
CRHBP	14.9734	-0.0144567	0.172122	-0.083991	0.933064	0.975495
MFAP4	1748.98	0.0106919	0.128515	0.0831956	0.933696	0.975495
PLA2R1	146.835	0.00810424	0.0977238	0.0829301	0.933907	0.975495
VWCE	123.839	0.00946832	0.114509	0.0826865	0.934101	0.975495
IGFBP6	1187.15	-0.00920205	0.113123	-0.0813453	0.935167	0.97604
CYP2S1	10.6636	-0.0110311	0.136769	-0.0806551	0.935716	0.976044
IL13	7.42095	0.017328	0.217854	0.0795397	0.936603	0.976401
GFOD2	636.431	-0.0048026	0.0625224	-0.0768141	0.938771	0.978092
HSPA1A	3732.17	0.0105693	0.140993	0.0749637	0.940244	0.979056
ANXA2	8543.11	0.00659774	0.095359	0.0691884	0.94484	0.980422
C9orf72	1437.34	-0.00774263	0.106938	-0.072403	0.942281	0.980422
CTF1	534.401	-0.00560419	0.078736	-0.0711771	0.943257	0.980422
ENDOU	31.7933	-0.0116163	0.166314	-0.0698455	0.944317	0.980422
LNPEP	3704.03	0.00310778	0.04357	0.0713283	0.943136	0.980422
PXDN	1148.56	0.00469489	0.0668265	0.0702549	0.943991	0.980422
TMEM98	179.119	-0.00522785	0.0768565	-0.0680209	0.945769	0.980818
ACAN	34.6972	-0.0103479	0.177867	-0.0581775	0.953607	0.981397
ALG1	237.301	-0.00401084	0.0636844	-0.0629799	0.949783	0.981397
APMAP	2293.36	0.00779862	0.122488	0.0636683	0.949234	0.981397
BCAP31	2973.89	-0.00255167	0.0442337	-0.057686	0.953999	0.981397
HTRA1	969.292	-0.00481165	0.0818584	-0.0587801	0.953127	0.981397
IGHG1	156.691	-0.0112661	0.189976	-0.0593024	0.952711	0.981397
LAYN	260.384	-0.0107588	0.174606	-0.0616177	0.950867	0.981397
LEAP2	107.888	-0.00546036	0.0882892	-0.0618464	0.950685	0.981397
PLXNA4	289.563	-0.0108427	0.184404	-0.0587985	0.953113	0.981397
RCN3	358.321	-0.00412044	0.0677681	-0.0608021	0.951517	0.981397
SDF2L1	304.467	-0.0058126	0.0919173	-0.0632373	0.949578	0.981397
SERPINA3	4789.58	0.0178189	0.268865	0.0662744	0.947159	0.981397
TMEM50A	1537.72	0.00269661	0.0414843	0.0650032	0.948171	0.981397
TNFRSF10D	118.596	0.00474119	0.0747796	0.0634022	0.949446	0.981397
HMGB1	8707.93	0.00199076	0.0357391	0.0557026	0.955579	0.982458
KARS1	10560	0.00253598	0.0470476	0.0539024	0.957013	0.983368
COL6A3	8078.43	-0.00418951	0.0793872	-0.0527732	0.957913	0.983728
FCMR	612.354	-0.0078765	0.152992	-0.0514832	0.958941	0.984219
ODAPH	9.04637	-0.00693837	0.137309	-0.050531	0.959699	0.984434
GPC2	29.8134	-0.00530544	0.108724	-0.0487971	0.961081	0.985287
LRG1	61.3267	-0.0101395	0.214621	-0.0472438	0.962319	0.985992
CHL1	48.1257	0.00571403	0.128891	0.0443322	0.96464	0.986026
COL22A1	219.761	-0.0114153	0.24672	-0.0462683	0.963096	0.986026
EREG	7.31029	0.00932782	0.211546	0.0440936	0.96483	0.986026
FGFBP2	22.9946	0.00659305	0.151004	0.0436614	0.965174	0.986026
RNASE1	2171.37	-0.00269727	0.0626435	-0.0430575	0.965656	0.986026
ST3GAL4	228.635	0.00286651	0.0649402	0.0441407	0.964792	0.986026
CDH19	63.4304	-0.00716066	0.180672	-0.0396336	0.968385	0.987472
IGHA1	179.937	-0.00666832	0.170082	-0.0392064	0.968726	0.987472
LAMB4	10.9888	-0.00636074	0.161495	-0.0393866	0.968582	0.987472
VEGFA	16881.9	0.00369735	0.0978574	0.0377831	0.969861	0.988066
PNPLA2	10789.5	0.00197693	0.054374	0.0363581	0.970997	0.988661
TMEM132A	172.628	-0.00235885	0.068917	-0.0342274	0.972696	0.989829
CA11	265.783	0.00260871	0.0926998	0.0281415	0.977549	0.994203
MEGF11	11.3396	0.00299354	0.115934	0.0258211	0.9794	0.99552
CNIH1	1702.83	0.000887615	0.0456873	0.019428	0.9845	0.996743
GFOD1	2411.21	-0.00170202	0.0847678	-0.0200786	0.983981	0.996743
KIAA0100	6533.2	-0.00115741	0.0555841	-0.0208226	0.983387	0.996743
KLKB1	51.4344	0.00348085	0.176046	0.0197724	0.984225	0.996743
MFSD13A	95.3319	0.00161404	0.0774695	0.0208346	0.983378	0.996743
NPC2	930.558	0.000901851	0.0448249	0.0201194	0.983948	0.996743
SMPDL3A	2052.07	0.00167385	0.0855937	0.0195558	0.984398	0.996743
LY6G5C	88.4324	-0.00137569	0.0765186	-0.0179785	0.985656	0.99735
GDNF	756.108	-0.00329995	0.192919	-0.0171054	0.986353	0.997491
SEMA3C	1198.85	0.00209255	0.142914	0.014642	0.988318	0.998915
CA14	314.11	-0.002945	0.240287	-0.0122562	0.990221	0.999147
MYDGF	533.89	0.000647678	0.0502296	0.0128944	0.989712	0.999147
PIGG	832.855	-0.000520422	0.0408899	-0.0127274	0.989845	0.999147
ADGRG5	7.67635	8.48199e-06	0.124037	6.83828e-05	0.999945	0.999945
AGPAT4	150.86	0.00054713	0.053804	0.010169	0.991886	0.999945
ANKRD36	125.413	0.000590413	0.0838528	0.00704107	0.994382	0.999945
CP	158.952	-0.000924813	0.152952	-0.00604644	0.995176	0.999945
DHRS4	826.232	-9.1179e-06	0.0759035	-0.000120125	0.999904	0.999945
DHRS4L2	930.317	-0.000107043	0.0798956	-0.00133978	0.998931	0.999945
ENTPD6	2425.2	1.42285e-05	0.0454454	0.000313091	0.99975	0.999945
LYPD5	12.2447	-8.08079e-05	0.135917	-0.000594536	0.999526	0.999945
OAS1	75.916	0.000536856	0.111824	0.0048009	0.996169	0.999945
OGN	127.776	-0.000837229	0.168312	-0.00497428	0.996031	0.999945
PCSK2	14.5953	0.000898478	0.151379	0.00593529	0.995264	0.999945
PCYOX1L	113.011	0.000349521	0.0816381	0.00428134	0.996584	0.999945
SERPINC1	11.7945	-0.00159437	0.18534	-0.00860237	0.993136	0.999945
SVEP1	1325.73	0.000429171	0.121771	0.00352441	0.997188	0.999945
TGM2	8716.54	0.000701717	0.183186	0.00383062	0.996944	0.999945
WNT2B	210.788	0.000186368	0.0473037	0.00393982	0.996856	0.999945
