# Supplementary material for: Genetic variation of putative myokine signaling is dominated by biological sex and sex hormones
Source: eLife. 2022 Apr 13;11:e76887. doi: 10.7554/eLife.76887 (PMC9094747; doi:10.7554/eLife.76887)
Supplement: Supplementary file 2. [file elife-76887-supp2.xlsx]

## Sheet: type by markers
Supplemental Table 2: Cell type marker genes used
endothelial cells		Slow twitch (Type I) muscle fiber		satellite cells		pericytes		fibroblasts		platelets		NK cells		Fast twitch (Type II) muscle fiber		T cells		monocytes		B cells		neurons (Schwann cells)
marker gene	p-value adj	marker gene	p-value adj	marker gene	p-value adj	marker gene	p-value adj	marker gene	p-value adj	marker gene	p-value adj	marker gene	p-value adj	marker gene	p-value adj	marker gene	p-value adj	marker gene	p-value adj	marker gene	p-value adj	marker gene	p-value adj
GNG111	2.37086e-139	C32	4.70848e-291	MT1X3	5.42311e-284	HIGD1B	7.98238e-247	MFAP55	1.59228e-281	PLVAP1	3.0659e-163	CCL5	2.14886e-285	CASQ2	3.33657e-281	CD3E	6.66631e-276	SERPINA1	2.94658e-300	CD79A	1.26289e-243	PMP2	3.53282e-289
RNASE11	2.91935e-125	CFD2	1.5123e-264	TUBB2B	3.43163e-275	ABCC9	2.95863e-246	DEFB1	9.66669e-262	CCL14	1.61845e-154	HCST	1.70137e-283	ACTG2	1.88069e-236	CD521	4.19333e-255	CSTA	7.73714e-274	TCL1A	1.17109e-216	MIA	2.58588e-224
CLDN51	1.73576e-122	PTGDS2	6.27051e-232	MEG33	7.61351e-229	COX4I22	1.09757e-209	PLA2G2A1	1.17966e-248	PLAT	1.70418e-154	TYROBP	9.2994e-273	PTN	6.27669e-222	IL7R	7.71987e-231	MS4A6A	1.94538e-271	FCER2	4.43263e-187	S100B	3.8443e-201
AQP11	5.2379e-122	DPT	3.53199e-225	CHRNA1	2.2918e-224	NOTCH34	1.37472e-206	FSTL15	5.10011e-233	RAMP31	2.19931e-130	PRF1	3.19757e-265	ACTA29	1.82032e-204	CD3G	3.35635e-197	IL1B	4.22907e-255	BANK1	4.43263e-187	PRX	2.3337e-196
FABP4	4.5861e-121	ABCA82	1.07082e-223	FOSB3	4.75516e-218	ASPN	2.61692e-205	GFPT2	5.36959e-205	HLA-DQA1	4.14385e-123	CD7	4.98688e-262	ENTPD3	2.44202e-201	LTB1	8.29947e-191	S100A12	2.87446e-252	IGJ	6.27356e-133	KCNJ10	7.0026e-168
FABP41	2.16095e-117	GSN2	3.85801e-219	STAC3	3.75553e-215	KCNJ8	1.24298e-193	CD551	1.67723e-203	RASA4	3.70116e-99	FCGR3A	2.13447e-255	TPM29	4.61946e-200	CD21	2.95617e-165	CFP	5.54087e-237	VPREB3	6.27356e-133	SPP1	7.0026e-168
TM4SF11	1.09321e-116	PDGFRL2	5.38889e-215	SPATS2L3	1.4683e-214	PDGFRB4	1.24319e-174	CD2482	7.19568e-184	OLFM1	2.19152e-71	HOPX	1.67483e-252	LBH1	5.49591e-197	PRKCQ-AS1	7.41801e-106	IFI30	2.71846e-236	IRF81	9.30685e-118	DRP2	7.0026e-168
RGCC1	2.67358e-113	CXCL142	3.67024e-211	PAX7	2.2211e-205	MFGE83	1.52588e-154	TNXB5	7.64244e-181	NUAK1	2.11507e-60	IL2RB	5.64768e-231	RCAN2	5.50321e-194	CCR7	1.03611e-102	MS4A7	2.04647e-223	FAIM31	6.63927e-113	GLDN	2.95342e-143
CD74	5.42684e-111	SMOC22	1.58947e-210	FOS3	6.95882e-204	TNFRSF21	9.90437e-142	SEMA3C	7.68069e-181	ECSCR6	5.79983e-60	CD247	2.62847e-228	PHLDA2	1.5038e-193	TRAT1	2.02679e-102	MPEG1	5.96799e-221	BLNK	3.60063e-110	PLP1	2.969e-132
IFI271	1.88916e-107	C1S2	9.39316e-208	CXCL143	8.31072e-204	STEAP4	1.03238e-137	UAP12	3.79317e-180	HLA-DPB16	2.05173e-59	PTPRCAP	1.29208e-226	MYLK	3.35272e-174	LCK1	8.92998e-102	LILRA5	2.51163e-220	BCL11A	7.18788e-106	ERBB3	3.45108e-125
VWF1	6.06859e-105	COL6A32	4.23169e-207	CRYAB2	1.80504e-180	CPE4	5.23212e-129	CHRDL15	2.62684e-178	SPHK1	3.21996e-58	FGFBP2	2.03469e-215	TAGLN10	1.0453e-168	PTPRC1	5.42871e-92	SPI1	5.18336e-211	BTLA	7.44531e-94	SNCA	3.45108e-125
B2M1	8.31672e-104	MGP2	2.46171e-203	CSRP23	2.84591e-176	CPM	7.08346e-122	PI164	1.93646e-173	CRHBP	1.05319e-57	GZMM	6.55869e-213	BGN2	1.17146e-163	TRAF3IP31	6.09166e-92	C5AR1	3.09405e-189	LINC00926	3.17036e-87	RELN	3.45108e-125
BTNL9	4.3453e-102	FBLN22	1.24455e-199	DLK1	4.09101e-169	MYO1B	2.76831e-121	MGST15	2.12647e-173	NOSTRIN1	3.57971e-57	CORO1A	8.24146e-210	MTHFD21	3.15707e-163	CORO1A1	9.58275e-89	HCK	2.00198e-188	HLA-DOB	3.26792e-85	BCAS1	4.53495e-125
S100A4	8.91869e-98	SERPINF12	1.81338e-196	IGFBP52	2.02491e-167	EPS8	1.71671e-110	NTM	1.0304e-168	PERP	3.54206e-54	ITGB2	6.73673e-208	SORBS24	2.02999e-159	CD27	9.4772e-86	RP11-290F20.3	3.71158e-176	SELL3	8.61614e-80	PRRG4	1.20631e-94
CD741	1.1569e-97	FBLN12	2.53335e-196	EGR12	9.60599e-167	IGFBP73	6.1111e-103	CCDC805	6.35399e-168	LHX6	3.75351e-54	PYHIN1	8.83013e-181	CCDC3	8.972e-154	FYB1	1.26785e-81	FPR1	1.72881e-172	AC079767.4	8.14356e-79	PLEKHB1	1.03772e-87
AC011526.11	3.12427e-95	CFH2	1.02124e-194	RPL73	7.2918e-161	TESC	6.71079e-103	LOXL1	2.33459e-166	HLA-DQB11	9.5641e-54	PLAC8	1.99478e-179	SLC38A11	4.80182e-147	CD371	7.48304e-76	APOBEC3A	1.72881e-172	IGLL5	8.14356e-79	PAQR6	2.16407e-82
CA41	3.72814e-95	COL1A22	3.60803e-193	JUNB3	3.93639e-159	ANO1	4.73975e-94	NOVA15	3.44067e-163	HLA-DRA6	3.31989e-51	LCP1	4.2519e-178	MAP3K7CL	1.62371e-144	HCST1	8.30396e-69	BCL2A1	6.64197e-166	FCRL2	8.14356e-79	RP1-65J11.1	3.73469e-73
A2M	2.2154e-94	PCOLCE2	3.16604e-176	TMSB4X3	1.87153e-155	MYL94	2.87578e-92	ADAMTS5	1.21403e-159	SNHG7	6.5345e-51	CD160	8.41333e-173	GUCY1A31	1.43698e-143	LIMD21	3.94388e-68	IL8	8.04569e-165	FCRL1	8.14356e-79	RP4-792G4.2	3.73469e-73
FABP51	7.42264e-94	CILP	5.37932e-168	RPS183	6.75662e-154	CNGA1	1.97499e-91	SPRR2B	2.08009e-159	LMCD1	3.96945e-44	GZMH	1.64376e-165	FBXL13	2.07125e-143	CD691	1.64953e-63	RNASE6	1.68103e-158	FCRLA	8.14356e-79	MT3	3.73469e-73
CD36	2.92855e-93	SCN7A	1.18172e-166	2021-06-03	1.77338e-152	FAM162B	2.53576e-88	SCARA51	3.4807e-155	JAM26	2.8548e-43	SAMD3	3.55997e-163	SLIT3	4.37863e-138	RP11-277L2.4	2.41452e-61	RGS18	1.59136e-157	GAPT	8.14356e-79	LSAMP	4.2168e-73
AQP1	9.66648e-93	ABCA10	9.08997e-164	RPS3A3	1.03126e-148	GJC1	2.32759e-85	EFEMP11	2.29117e-150	DUSP23	7.96405e-43	ALOX5AP	3.50314e-155	FRZB1	2.25684e-137	SELL1	1.2655e-60	TYROBP1	1.54285e-155	CD373	5.02337e-74	SFRP5	4.2168e-73
CAV11	1.61034e-91	IGF11	4.7021e-160	CADM2	9.72962e-147	CYGB1	3.03626e-83	GPNMB5	3.63767e-149	CD746	5.6931e-41	CLIC3	2.51459e-153	LMOD1	2.06692e-135	PTPRCAP1	1.15002e-54	PILRA	1.06368e-145	CD180	2.3425e-69	CDH19	1.4136e-71
VWF	4.07545e-89	LTBP42	1.07734e-159	RASD1	2.82472e-146	SPARC2	1.37252e-82	COL1A14	1.59044e-148	MLPH	6.05902e-41	CD69	1.70017e-152	CNN1	2.10421e-129	TBC1D10C1	1.78742e-54	RGS2	1.57129e-145	LTB2	5.5067e-68	PLLP1	8.30134e-65
TMEM881	1.38165e-87	IGFBP62	9.69606e-159	RPL35A3	9.26058e-144	ACTA24	4.47217e-82	MFAP45	3.78299e-142	IL1R1	1.08238e-40	MYOM2	9.1139e-152	RP11-332H18.41	4.99086e-128	IL2RG1	4.87288e-54	CTSS2	5.3731e-144	RP11-277L2.41	5.99438e-60	GPM6B1	1.13116e-64
IFI27	3.43669e-87	COL6A22	2.25451e-157	RPL10A3	2.83879e-143	MIR145	2.17022e-80	IGFBP65	5.66644e-142	PKP4	1.4381e-40	DOK2	5.2856e-151	PPP1R12B	3.68698e-124	CCL51	6.63505e-54	CSF2RA	9.92446e-142	CD523	5.63536e-59	MLIP	1.27338e-57
ITGA61	8.90705e-87	SFRP4	6.24818e-150	PON22	9.21189e-143	ITM2C4	3.74301e-80	CFD5	9.52104e-142	NRN16	2.2748e-40	PLEK	2.19585e-149	ITGA8	1.28743e-119	RPS276	6.78665e-54	STXBP2	1.02743e-138	ADAM28	2.9881e-58	CYB5R2	7.87122e-54
TM4SF181	2.86763e-85	FBLN52	1.51844e-149	B2M3	3.57217e-142	NR2F23	3.43324e-79	CREB52	3.74325e-138	ELTD16	8.47503e-40	XCL2	2.55241e-146	RGS16	9.70659e-119	LINC008611	1.05655e-51	CYBB	5.53047e-138	EAF21	1.49181e-56	SPTLC3	8.88501e-54
HLA-DRB11	3.60041e-85	COL6A12	9.41768e-148	RPL63	4.6549e-142	EGFLAM	3.52167e-78	FNDC1	7.97369e-133	PRCP4	1.07847e-39	FASLG	4.42874e-144	KLHL231	3.83714e-114	ITGA4	1.12767e-51	TNFSF13B	6.66288e-134	CXCR43	3.20065e-47	ANK3	2.96004e-48
MGLL1	1.43332e-83	PDGFRA	2.68352e-147	RPL313	2.47369e-141	PPP1R14A3	2.36859e-75	ACKR35	9.32273e-131	HLA-DPA16	1.45332e-39	NCR3	1.06271e-141	COX4I23	7.49315e-114	SIT1	3.49283e-51	AMICA1	3.37652e-130	RP11-861A13.4	8.23285e-46	TNC1	2.53883e-47
KIF251	1.92332e-80	PLAC92	6.42686e-146	PDLIM41	1.02576e-139	C20orf27	4.0405e-74	ALDH1A3	7.78622e-130	TSHZ22	9.72746e-38	PTPRC	1.49147e-141	NET1	1.32173e-113	CXCR41	3.49418e-51	FCER1G1	4.43821e-130	FAM26F1	1.70204e-45	HIST2H2BE	2.06433e-43
